# Supplementary material for: Interactions between strains govern the eco-evolutionary dynamics of microbial communities
Source: eLife journal article supplement (doi:10.7554/elife.74987), 2022-02-04

**a** conspecific strain randomly picked  
distance  $D$  away from each other

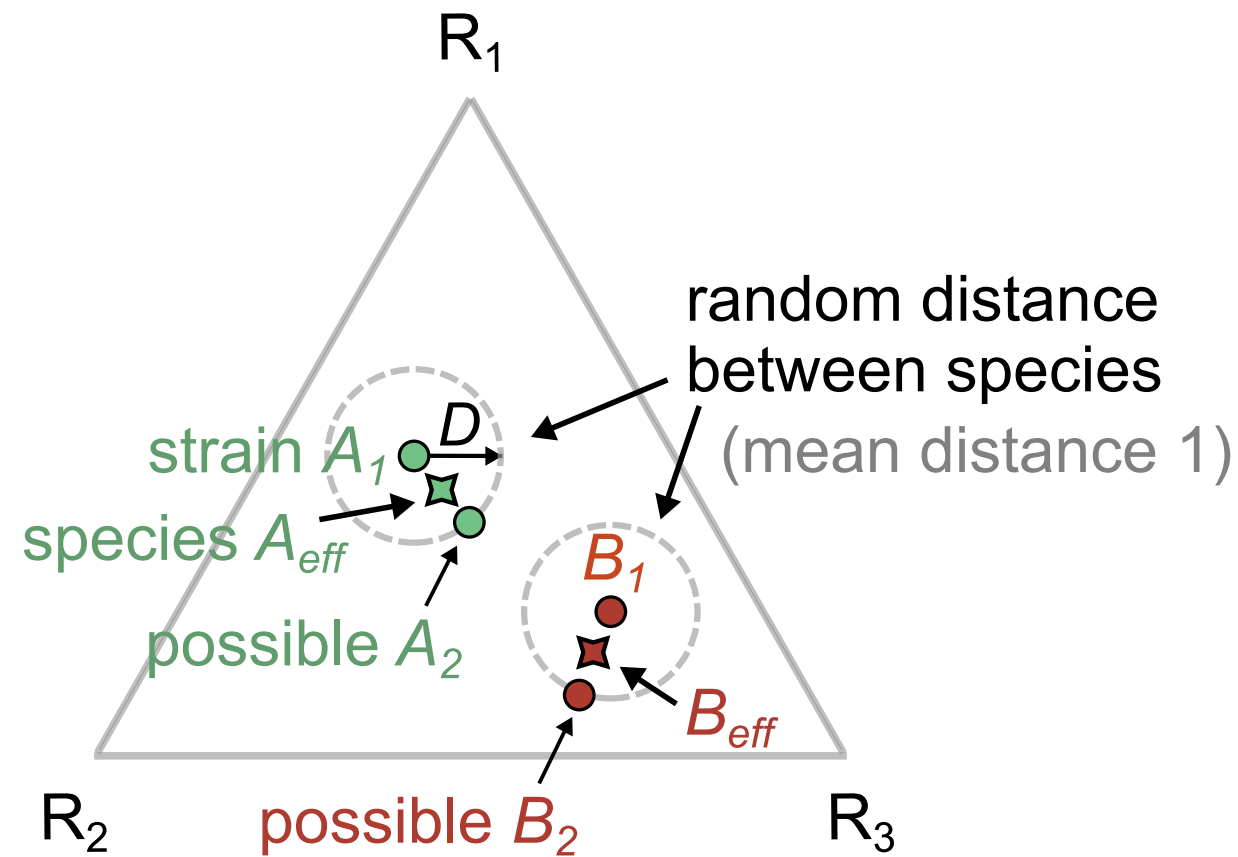

**b** when  $D$  is small ( $0 < D < 1$ )  
strain correlations often higher

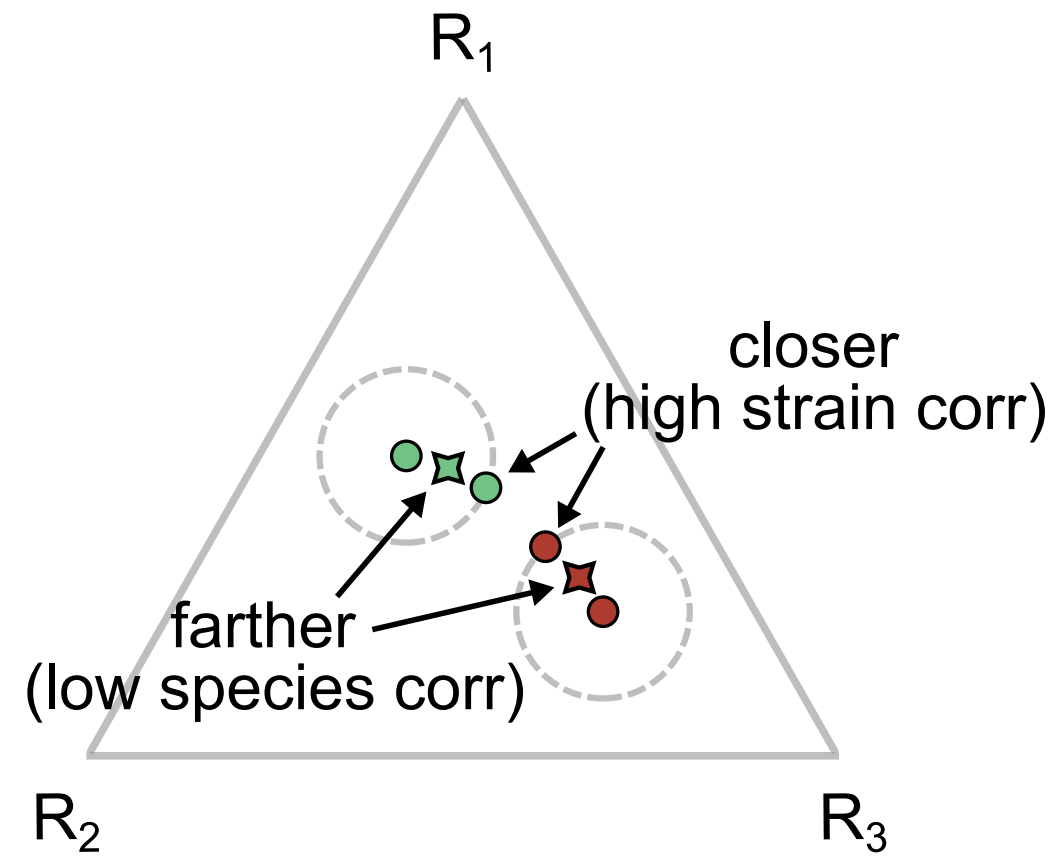

**c** when  $D$  is large ( $D \sim 1$ )  
strains correlations often lower

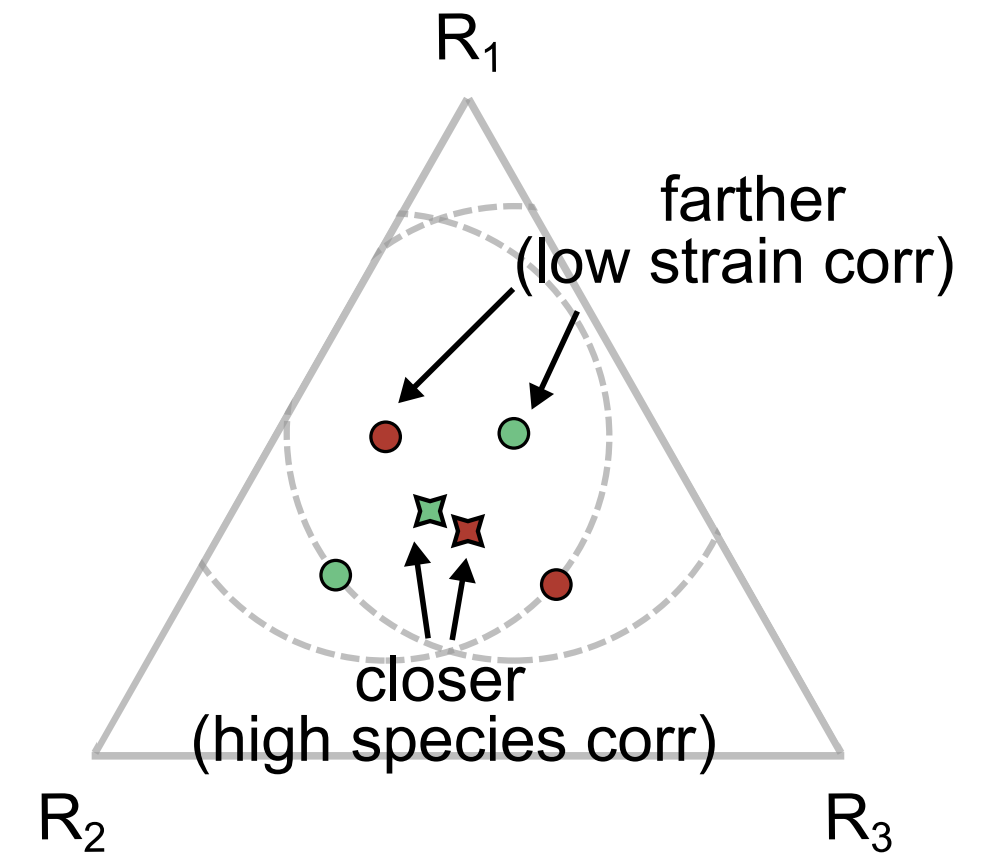

Supplement: supp [file elife-74987-supp-v1.zip]
