# Supplementary material for: Interactions between strains govern the eco-evolutionary dynamics of microbial communities
Source: eLife journal article supplement (doi:10.7554/elife.74987), 2022-02-04
Supplement: supp [file elife-74987-supp-v1.zip]

strains decouple beyond  $D > 0.1$

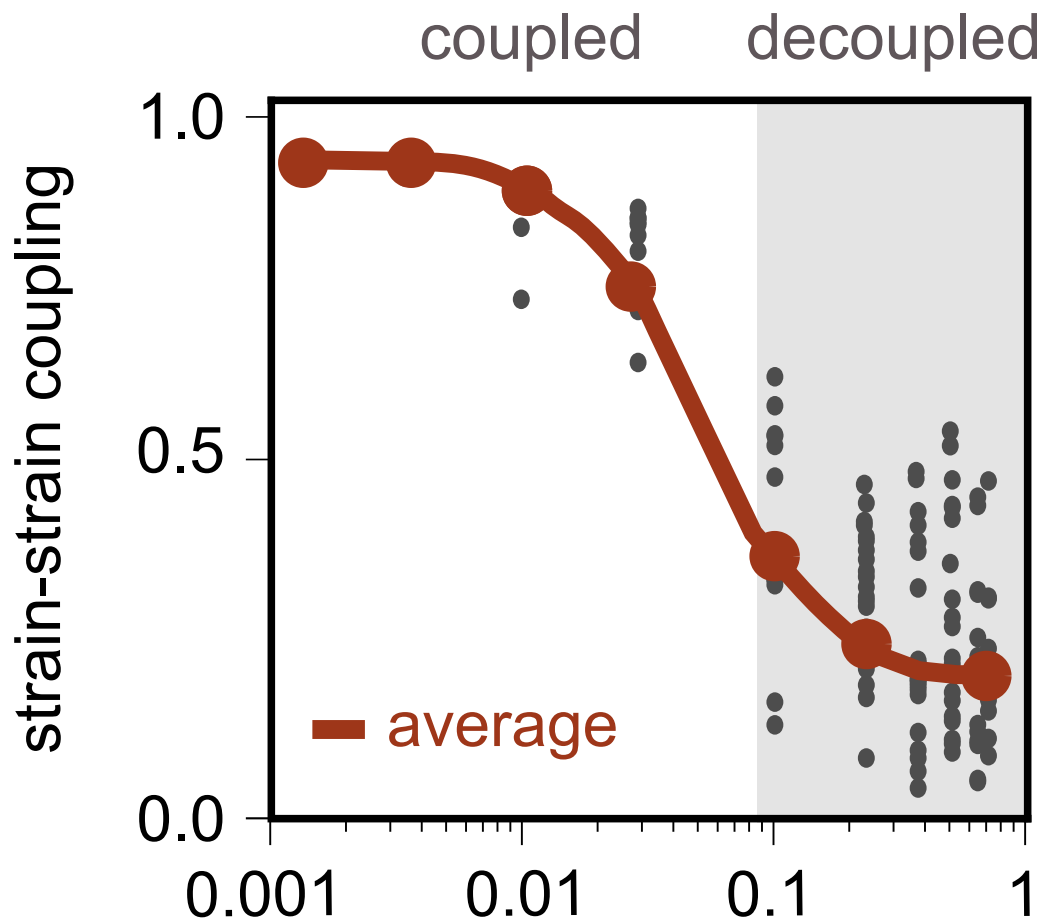

competitive distance  $D$  between strains  
(normalized to average distance between species)
