# Supplementary figures and images for: Interactions between strains govern the eco-evolutionary dynamics of microbial communities
Source: eLife journal article supplement (doi:10.7554/elife.74987), 2022-02-04

strain-strain correlation

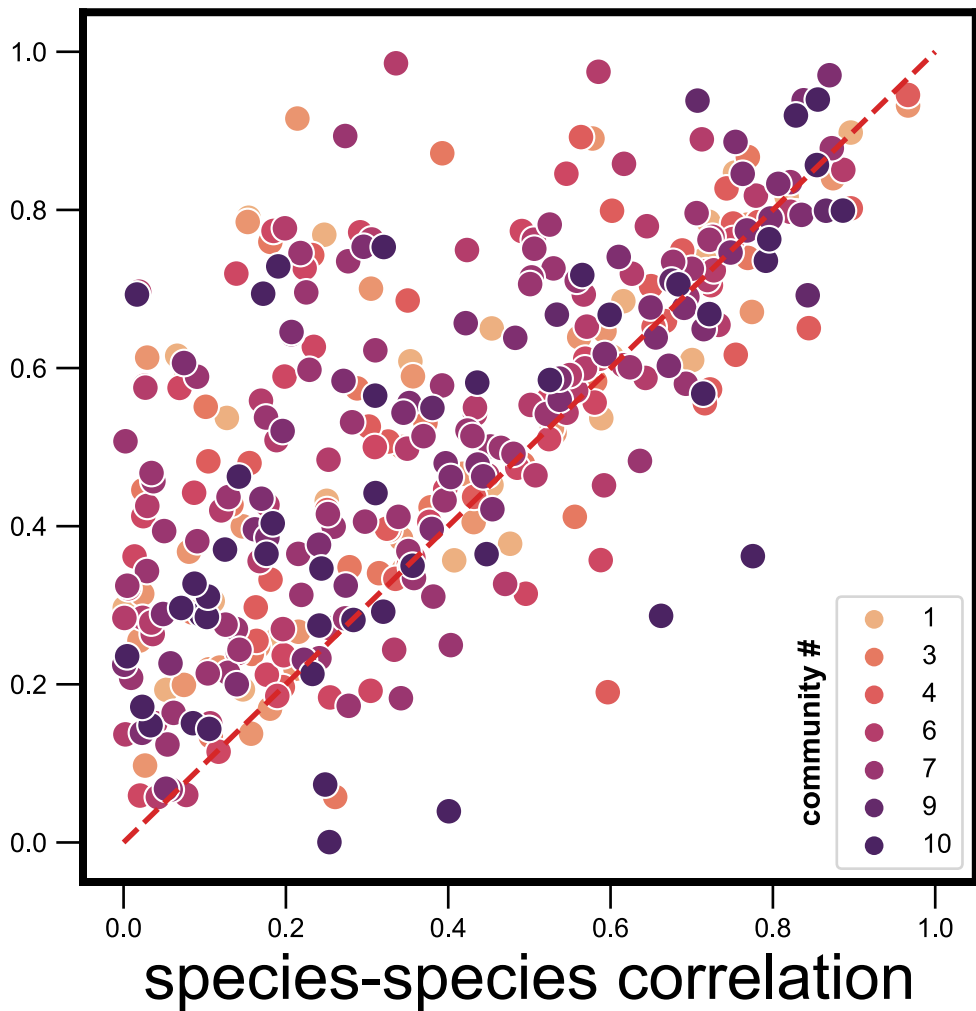

Supplement: supp [file elife-74987-supp-v1.zip]

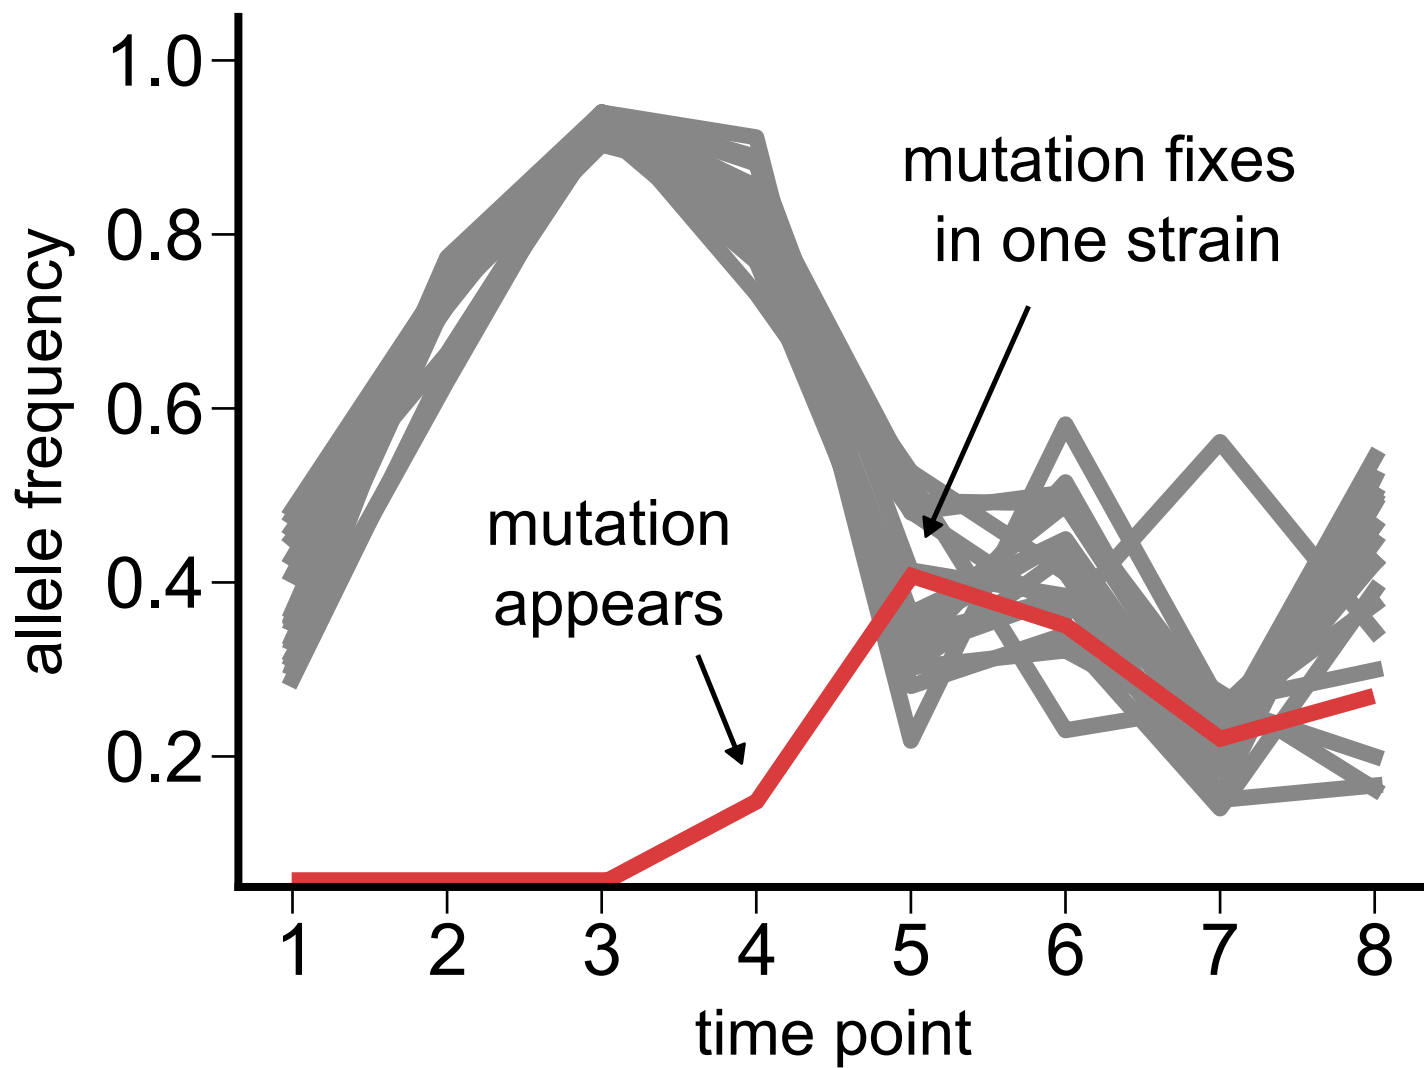

Supplement: supp [file elife-74987-supp-v1.zip]

# categories of SNPs differentiating strains of *Aquitalea magnusonii* from NCBI

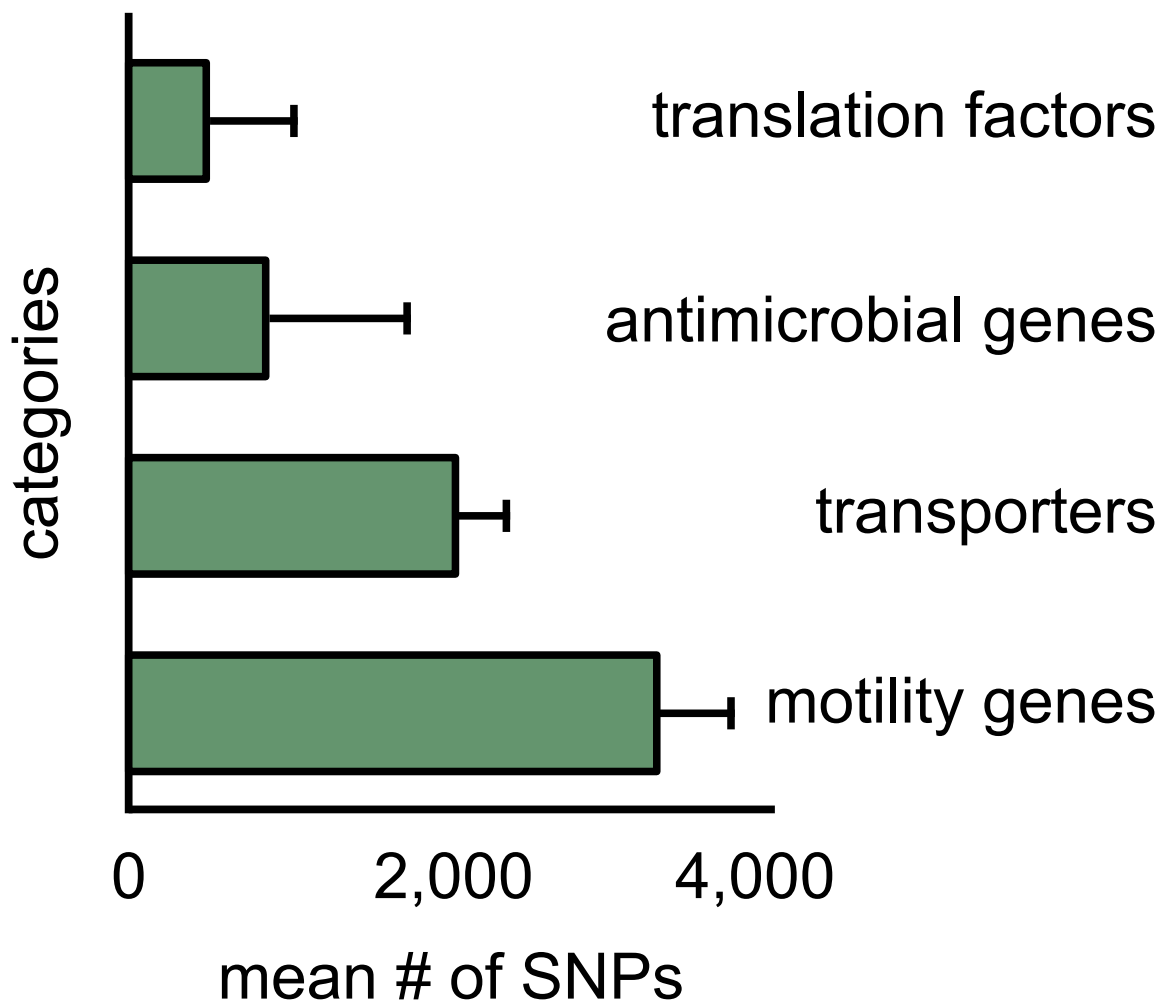

Supplement: supp [file elife-74987-supp-v1.zip]

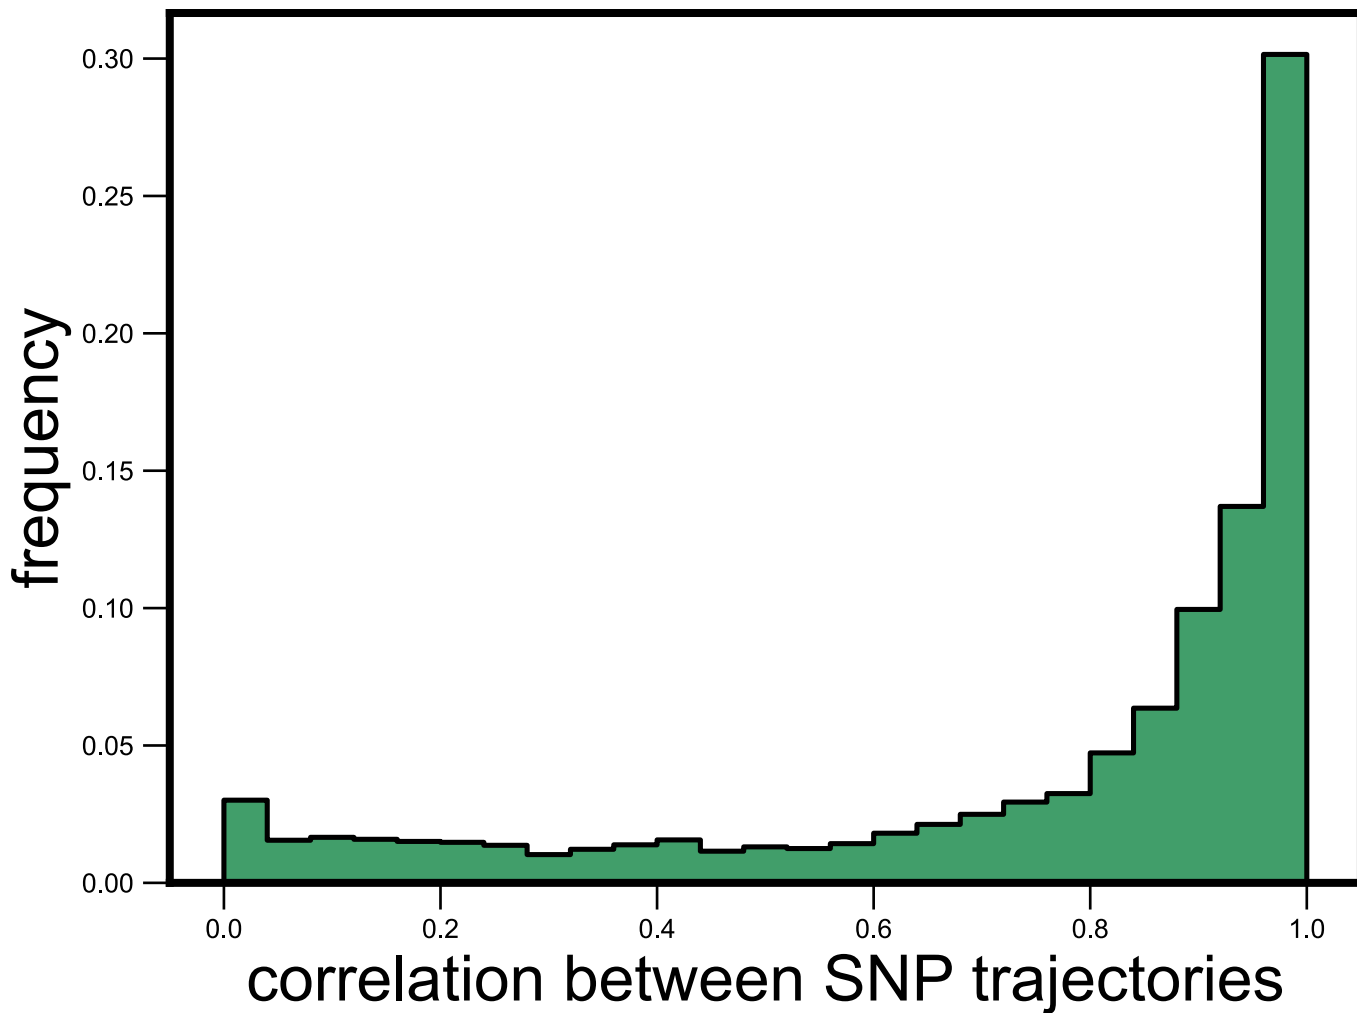

Supplement: supp [file elife-74987-supp-v1.zip]

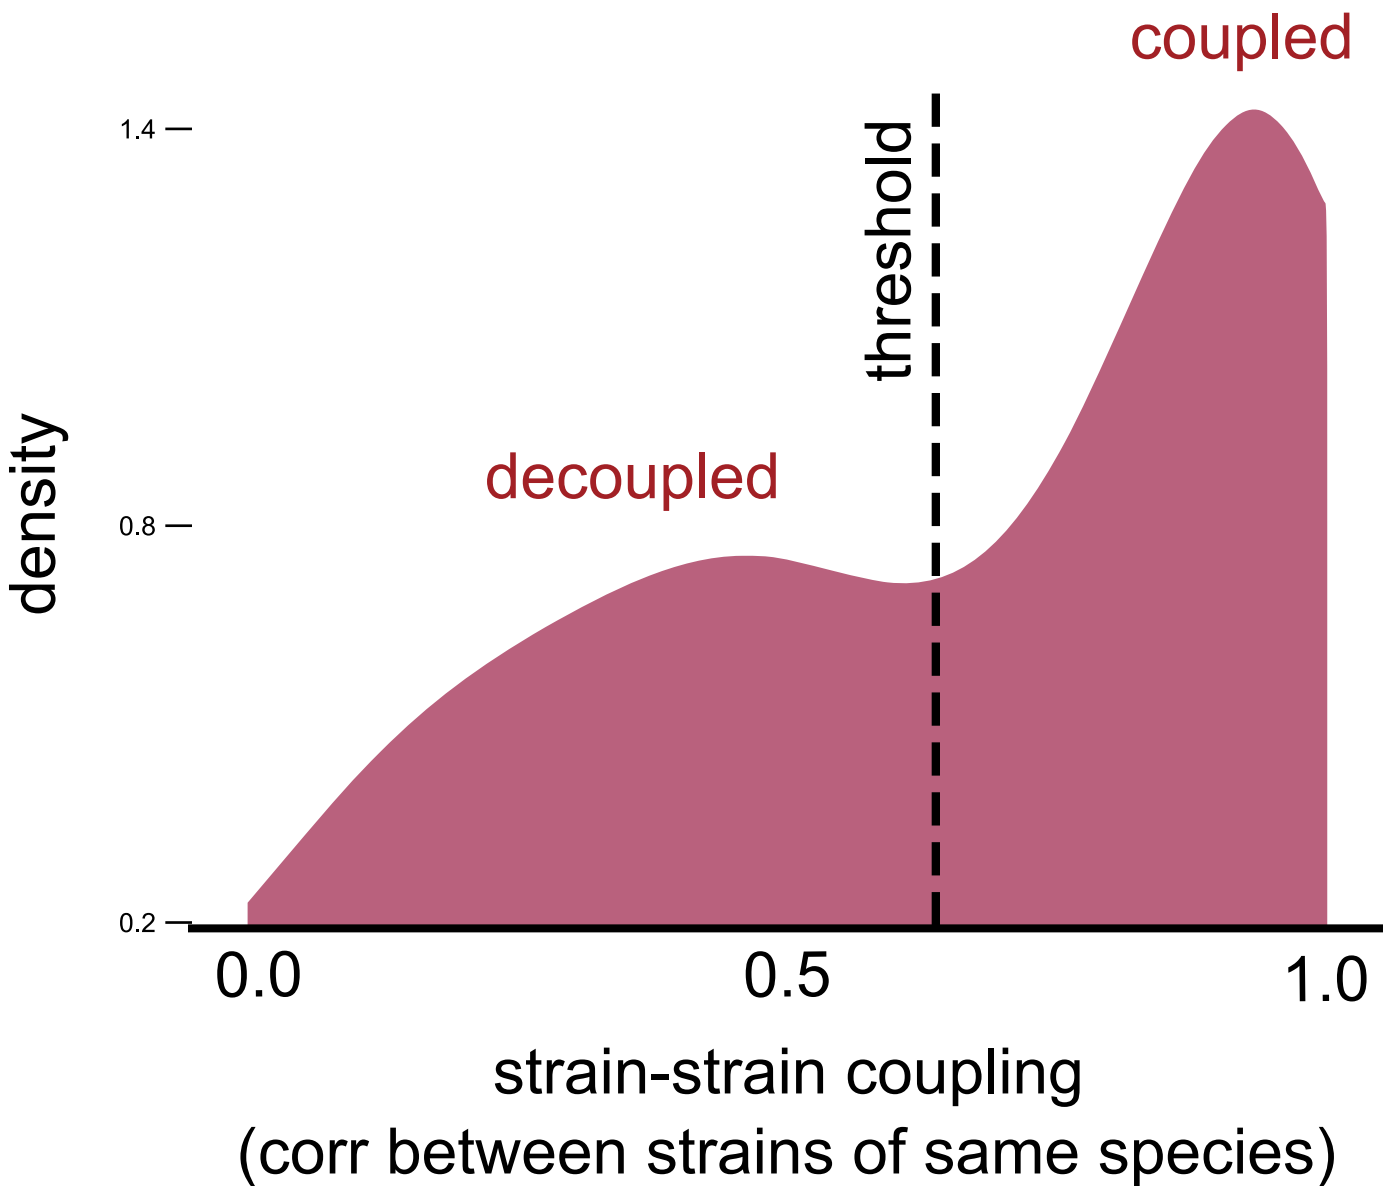

Supplement: supp [file elife-74987-supp-v1.zip]

# distribution of mutation types

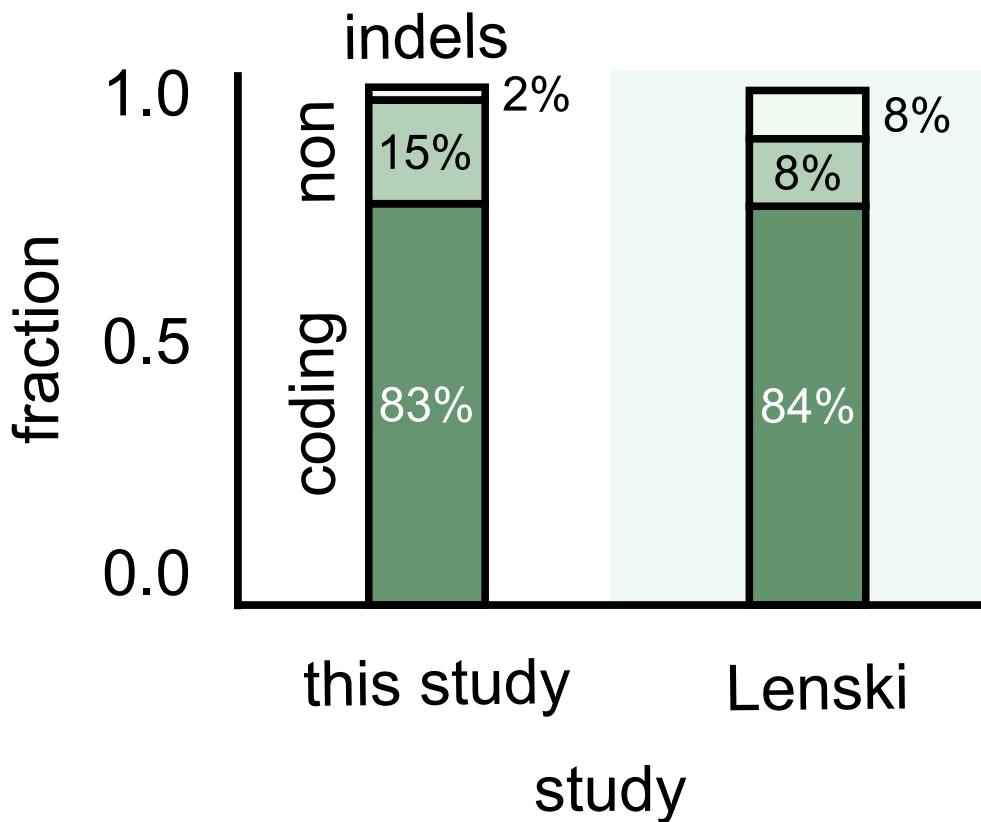

Supplement: supp [file elife-74987-supp-v1.zip]

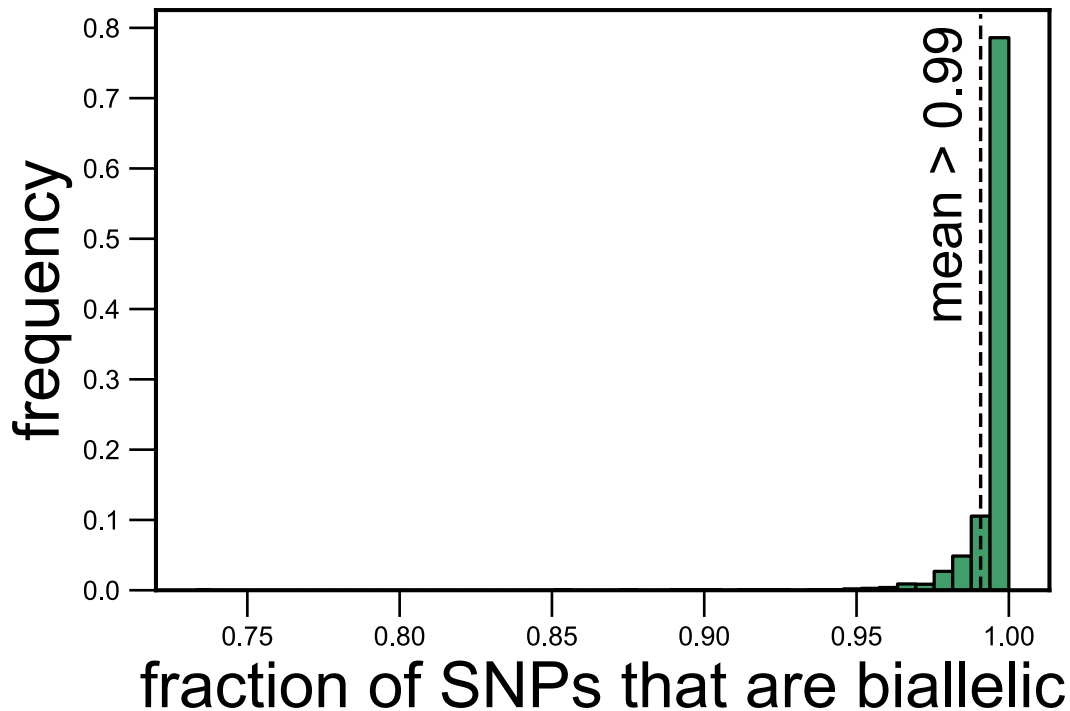

Supplement: supp [file elife-74987-supp-v1.zip]

strain-strain correlation

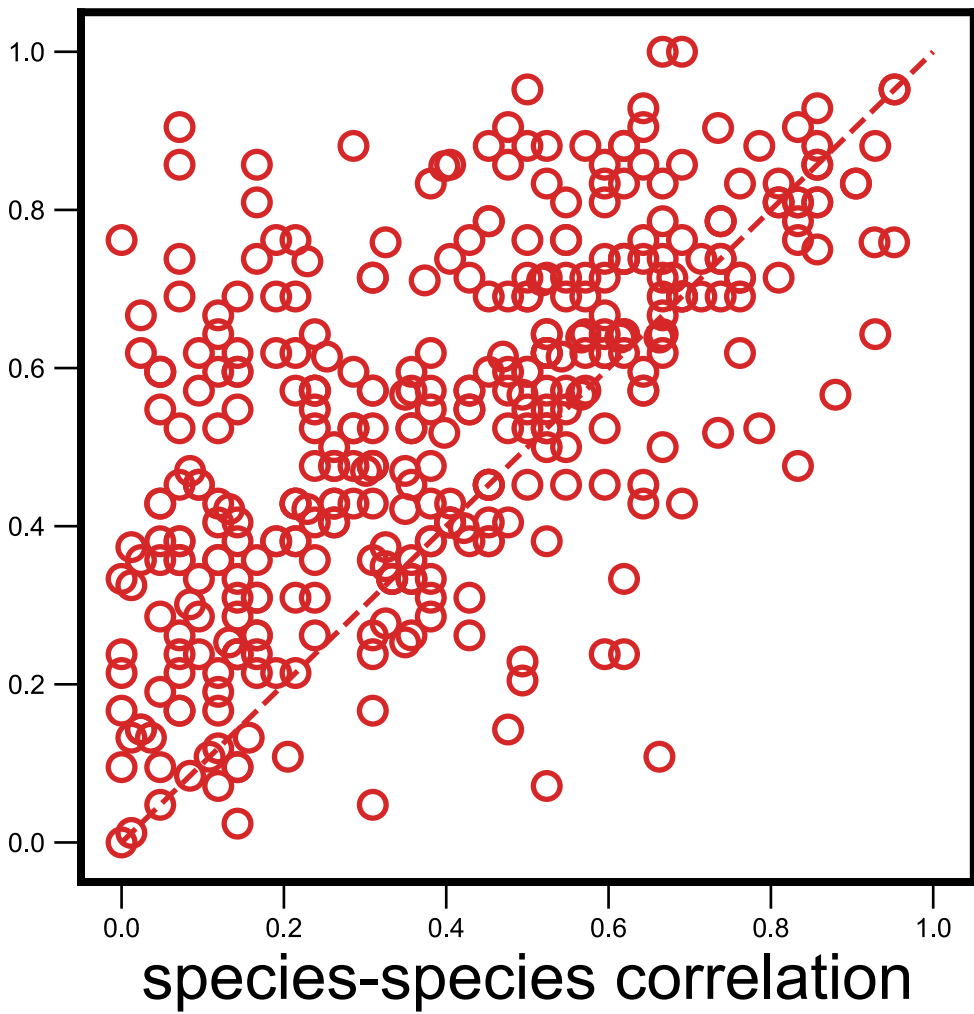

Supplement: supp [file elife-74987-supp-v1.zip]

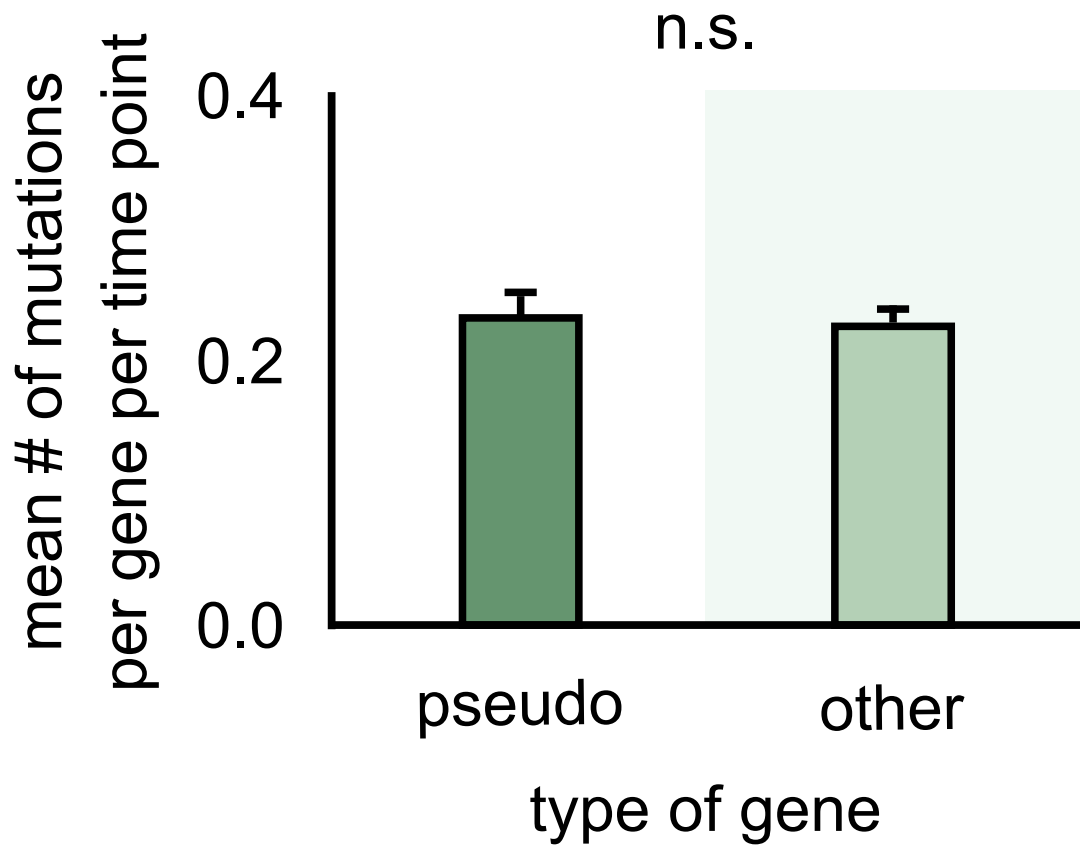

Supplement: supp [file elife-74987-supp-v1.zip]

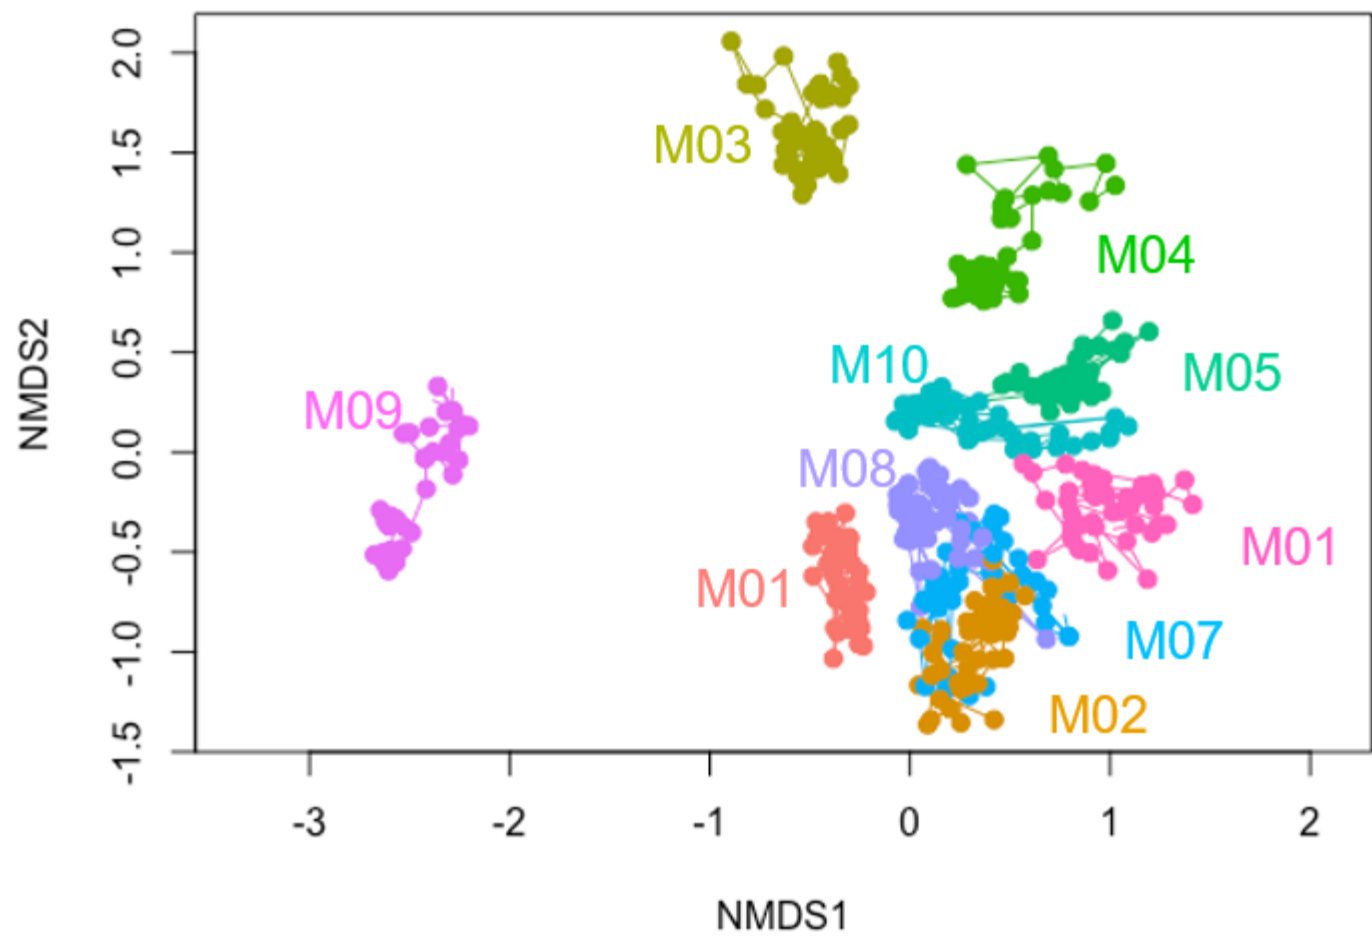

Supplement: supp [file elife-74987-supp-v1.zip]

M01

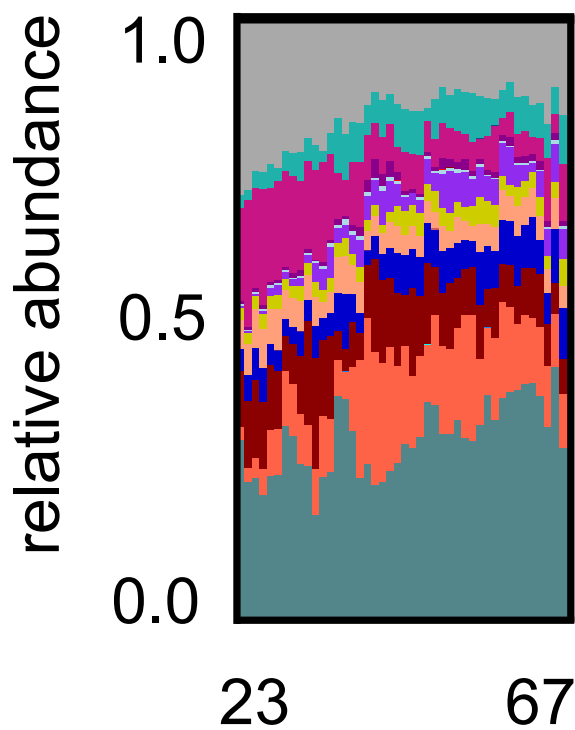

M02

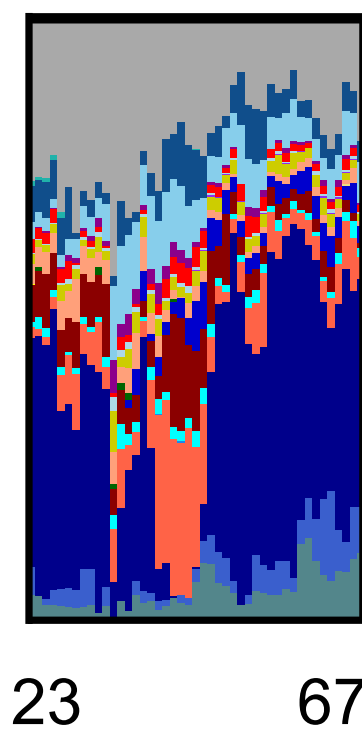

M03

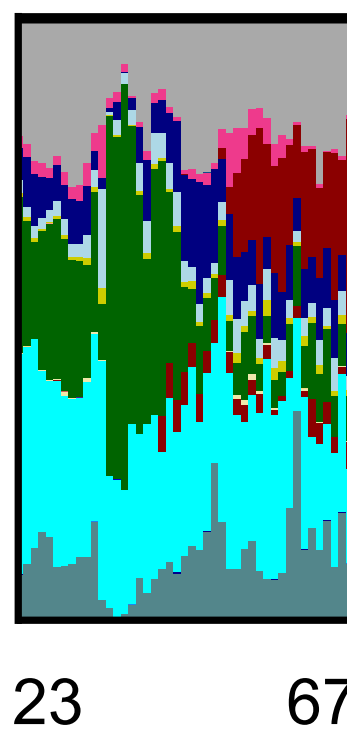

M04

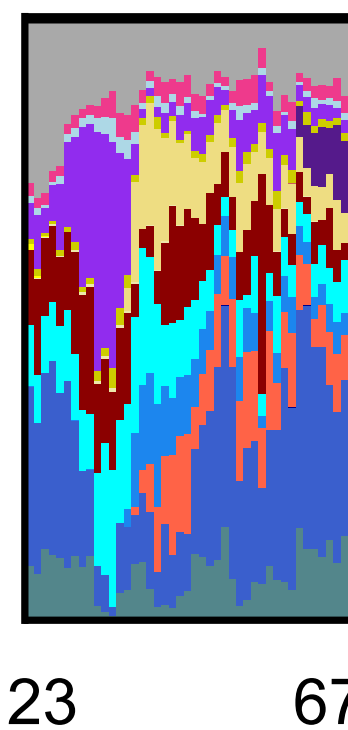

M05

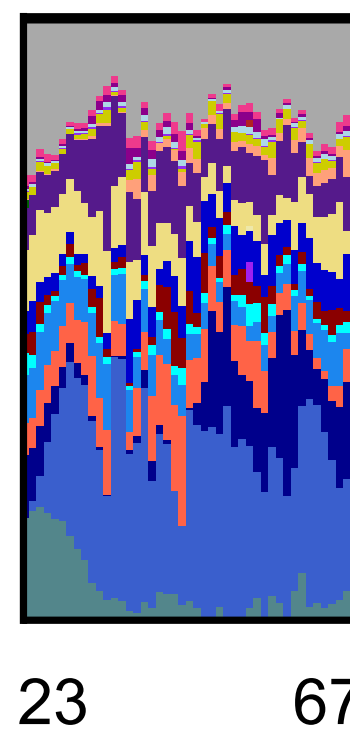

M06

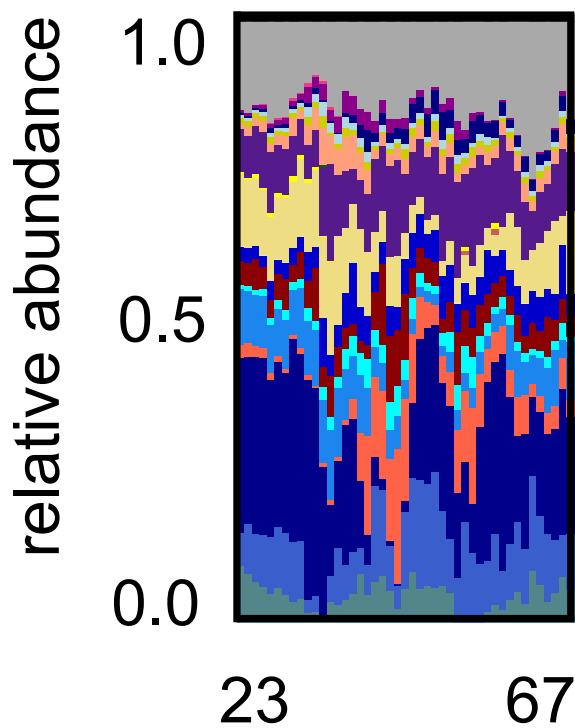

M07

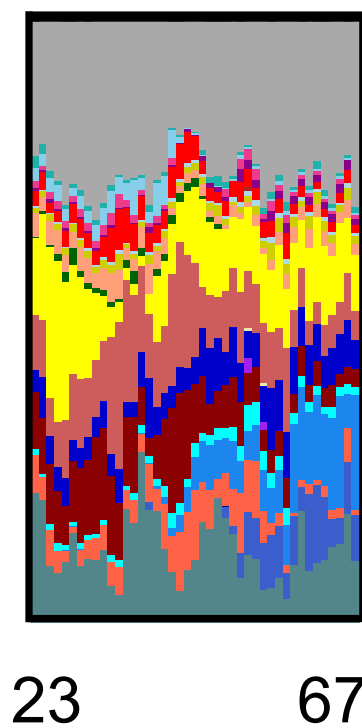

M08

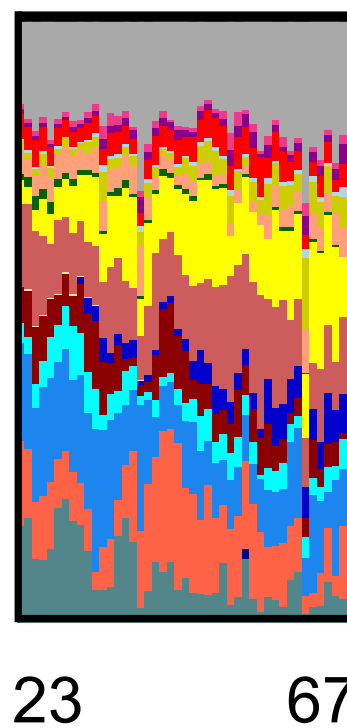

M09

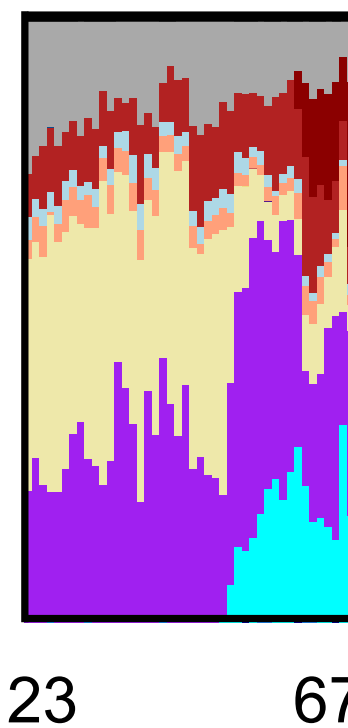

M10

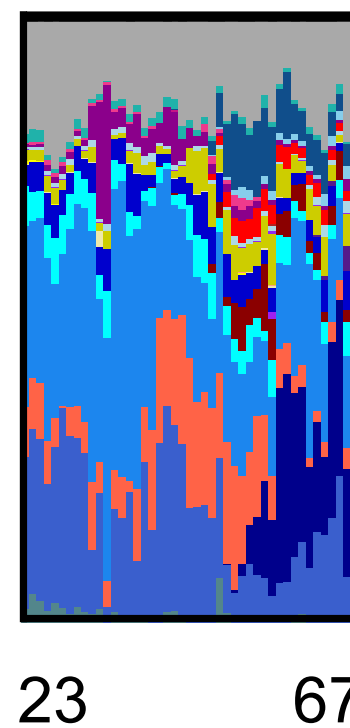

# of transfers

Supplement: supp [file elife-74987-supp-v1.zip]

# classifying coupled and decoupled strains

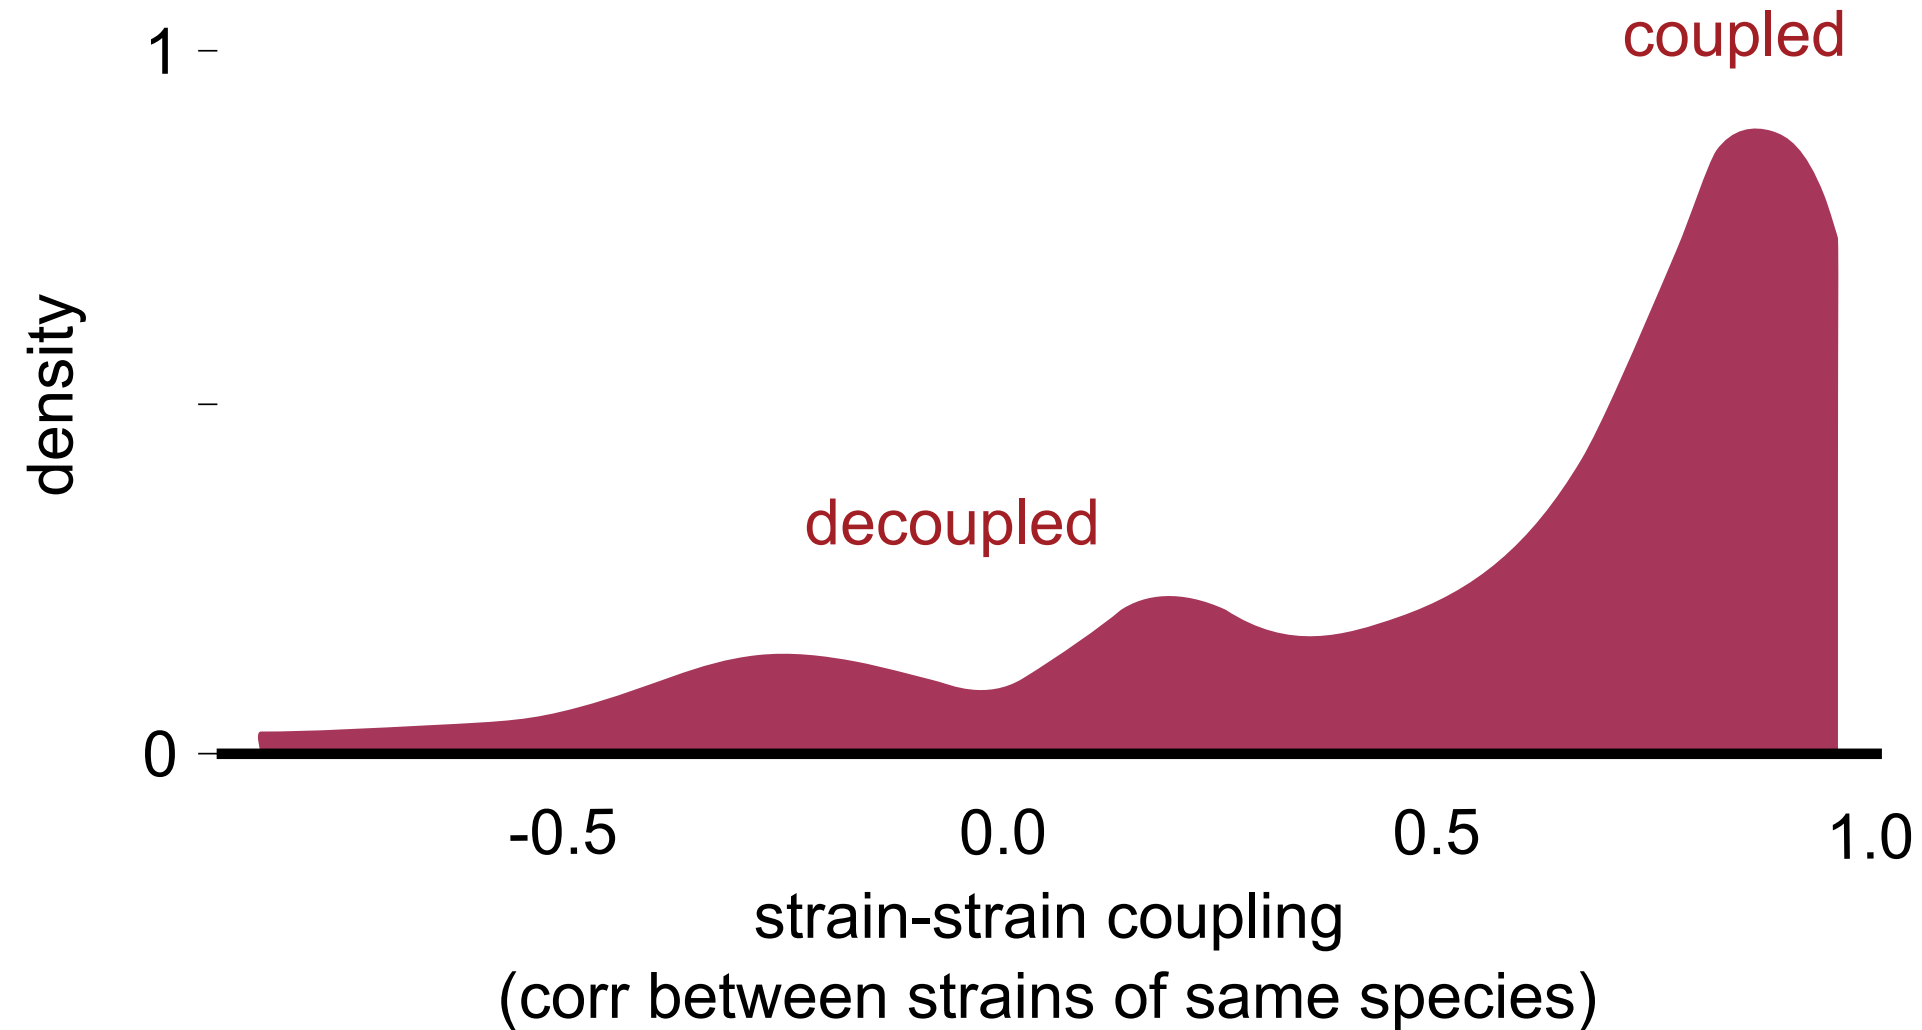

Supplement: supp [file elife-74987-supp-v1.zip]

# interaction networks for community M07

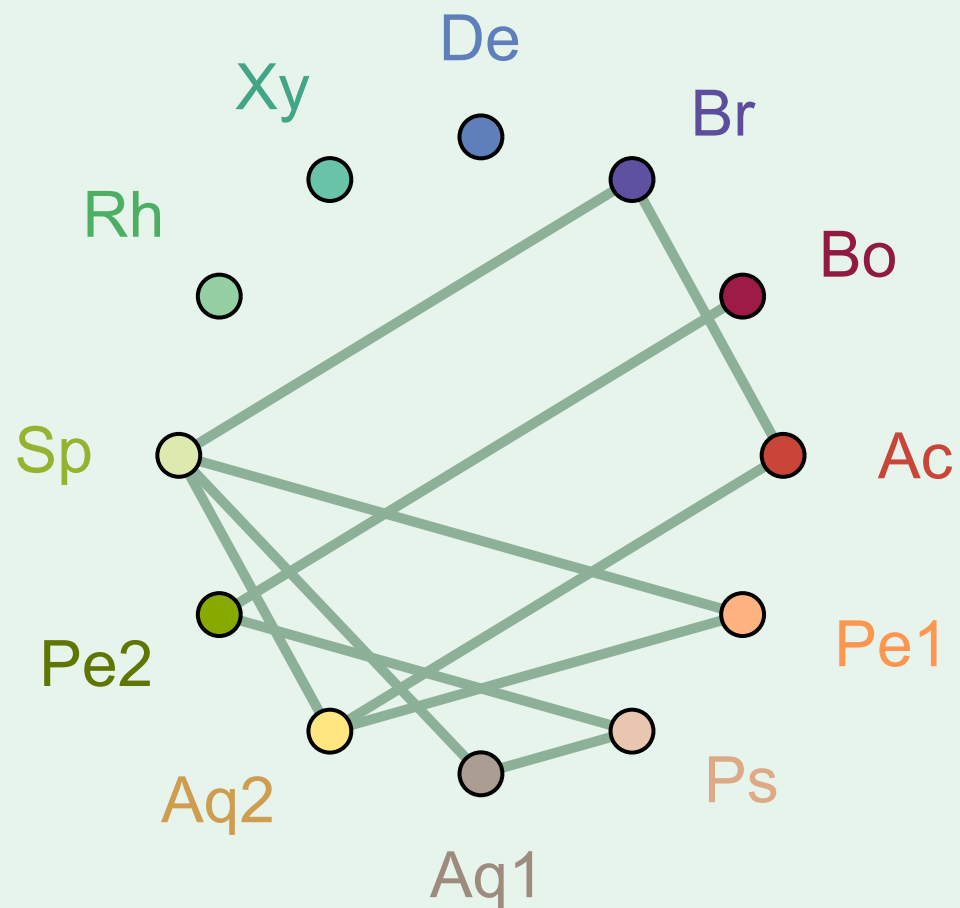

species-level

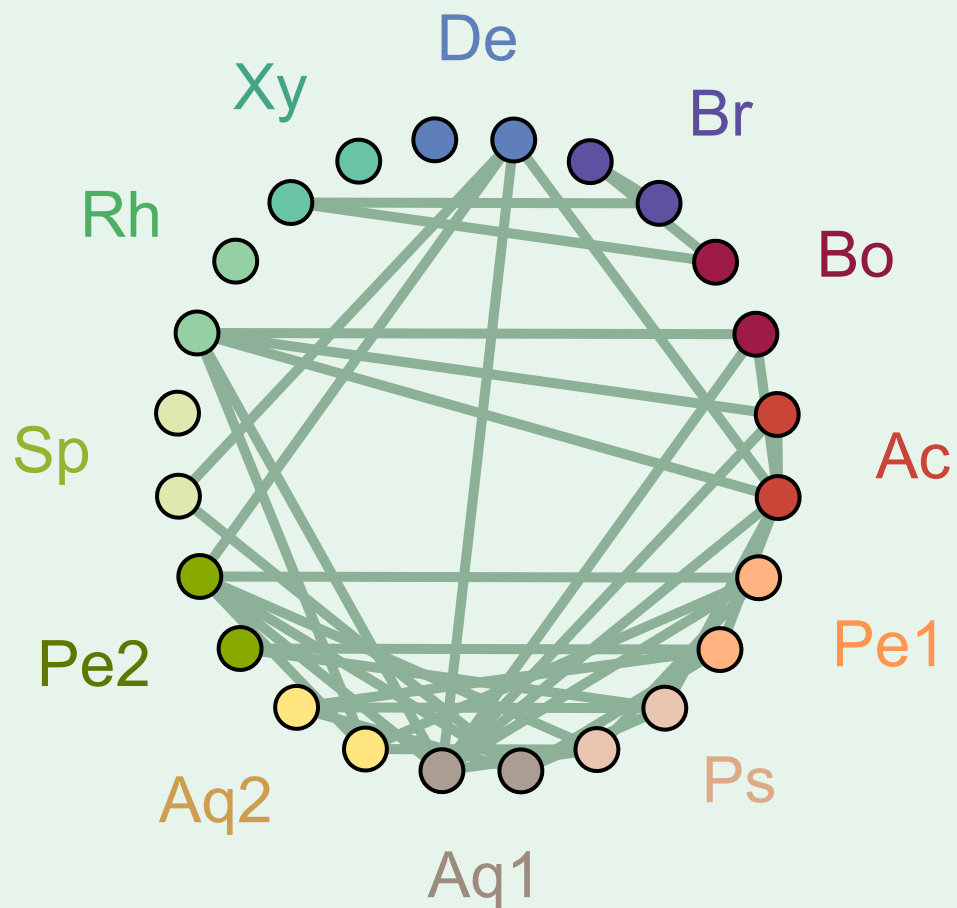

strain-level

Supplement: supp [file elife-74987-supp-v1.zip]

strain-strain correlation

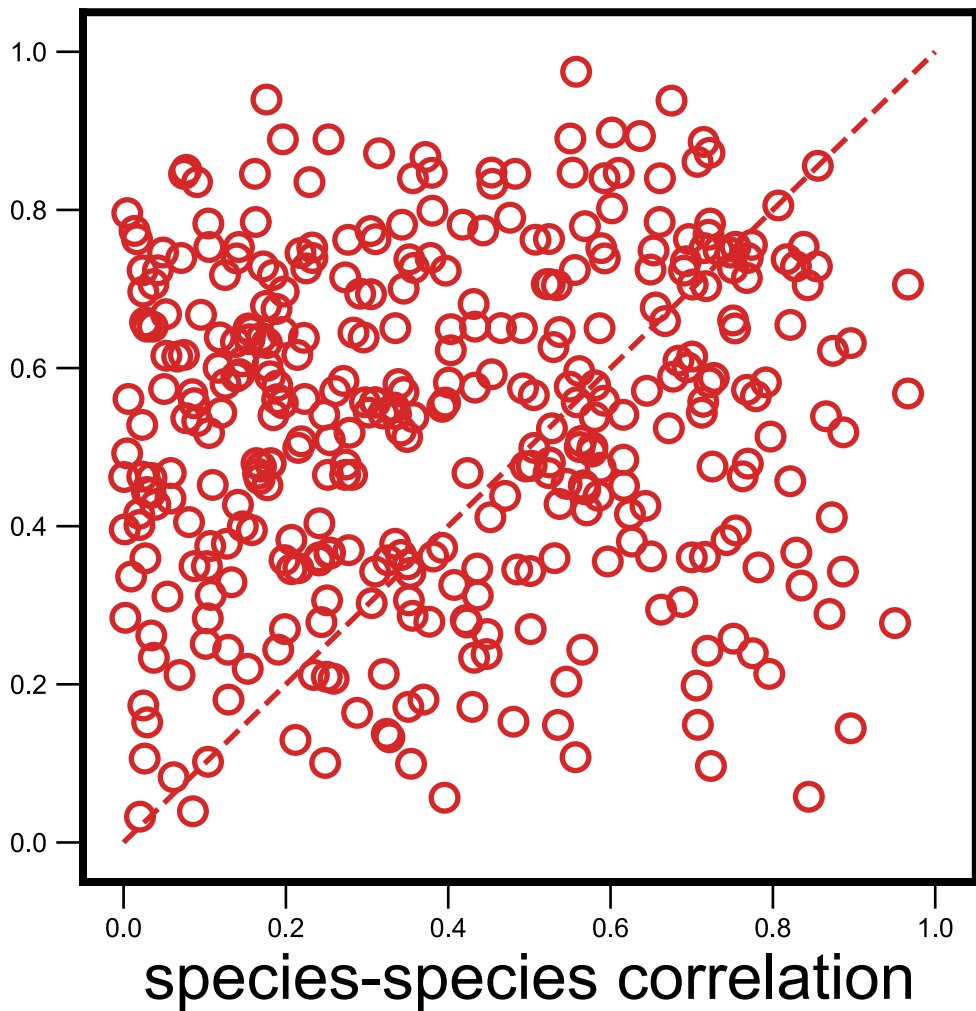

Supplement: supp [file elife-74987-supp-v1.zip]

**a**community M02  
ASV31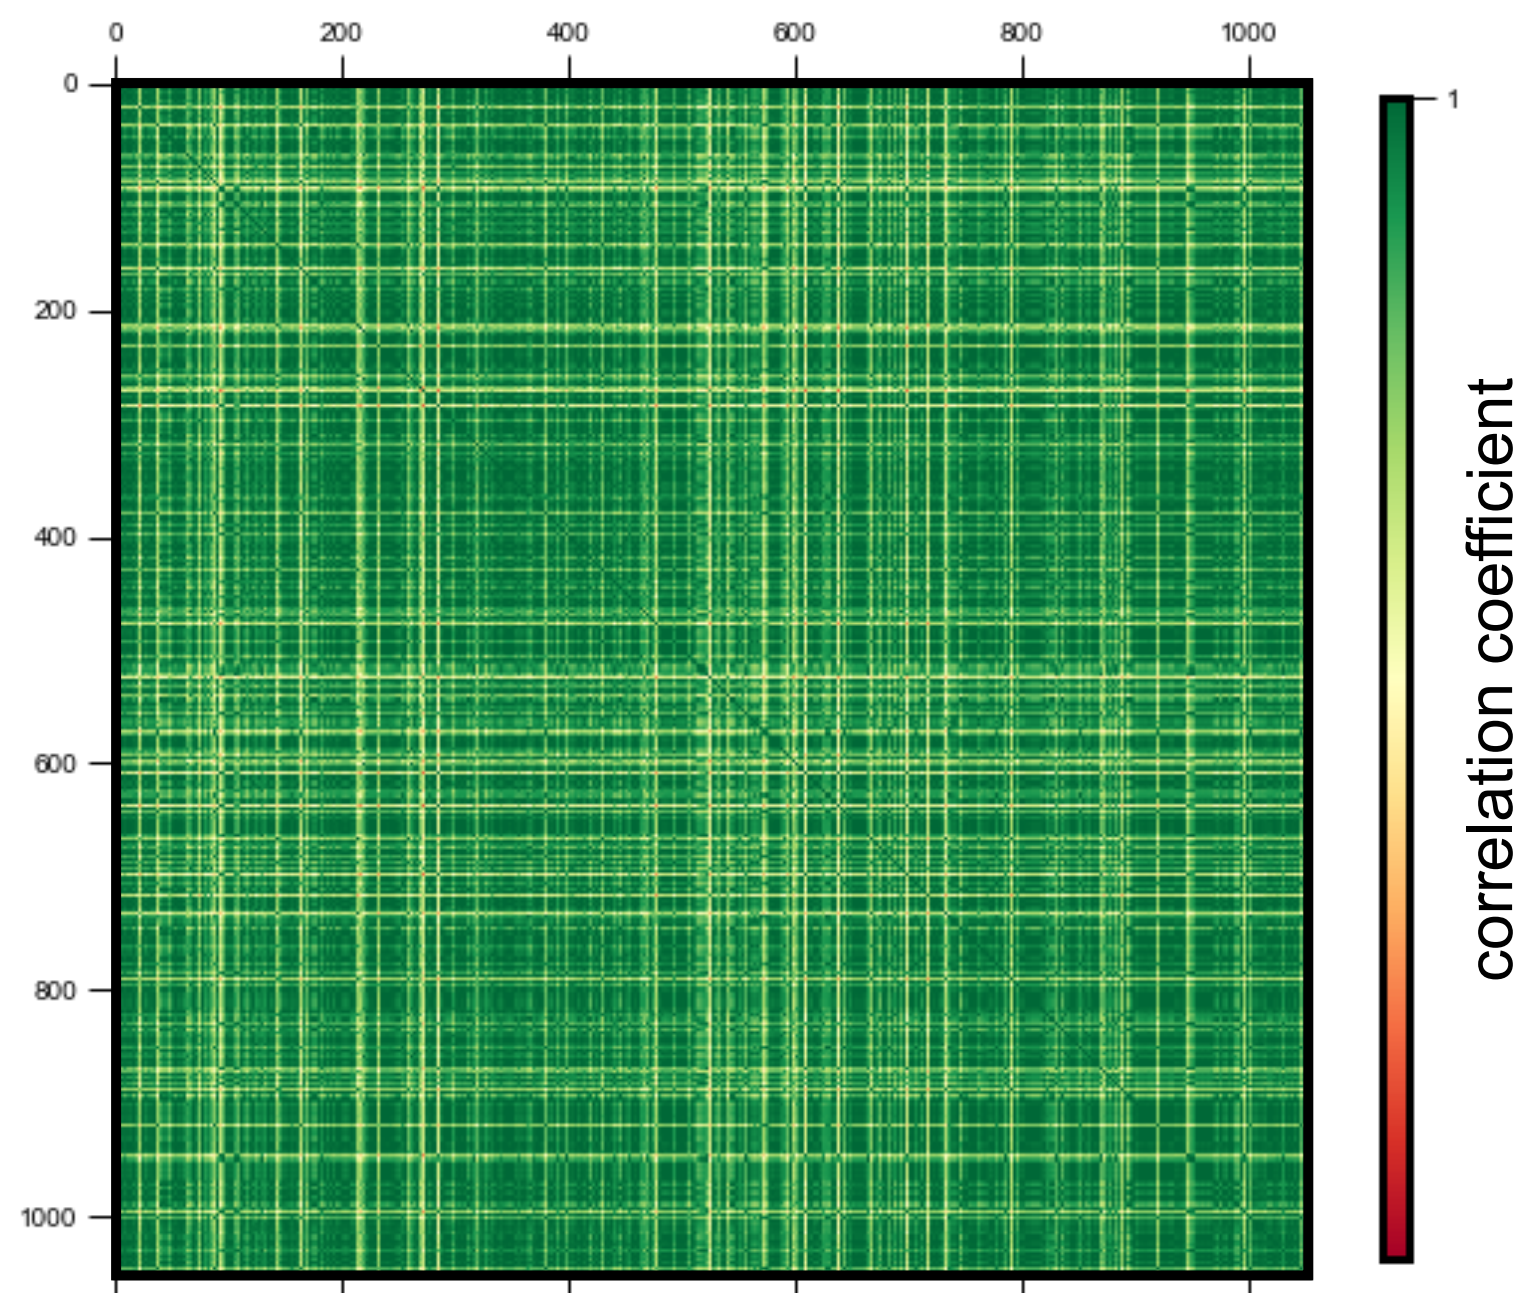**b**community M09  
ASV15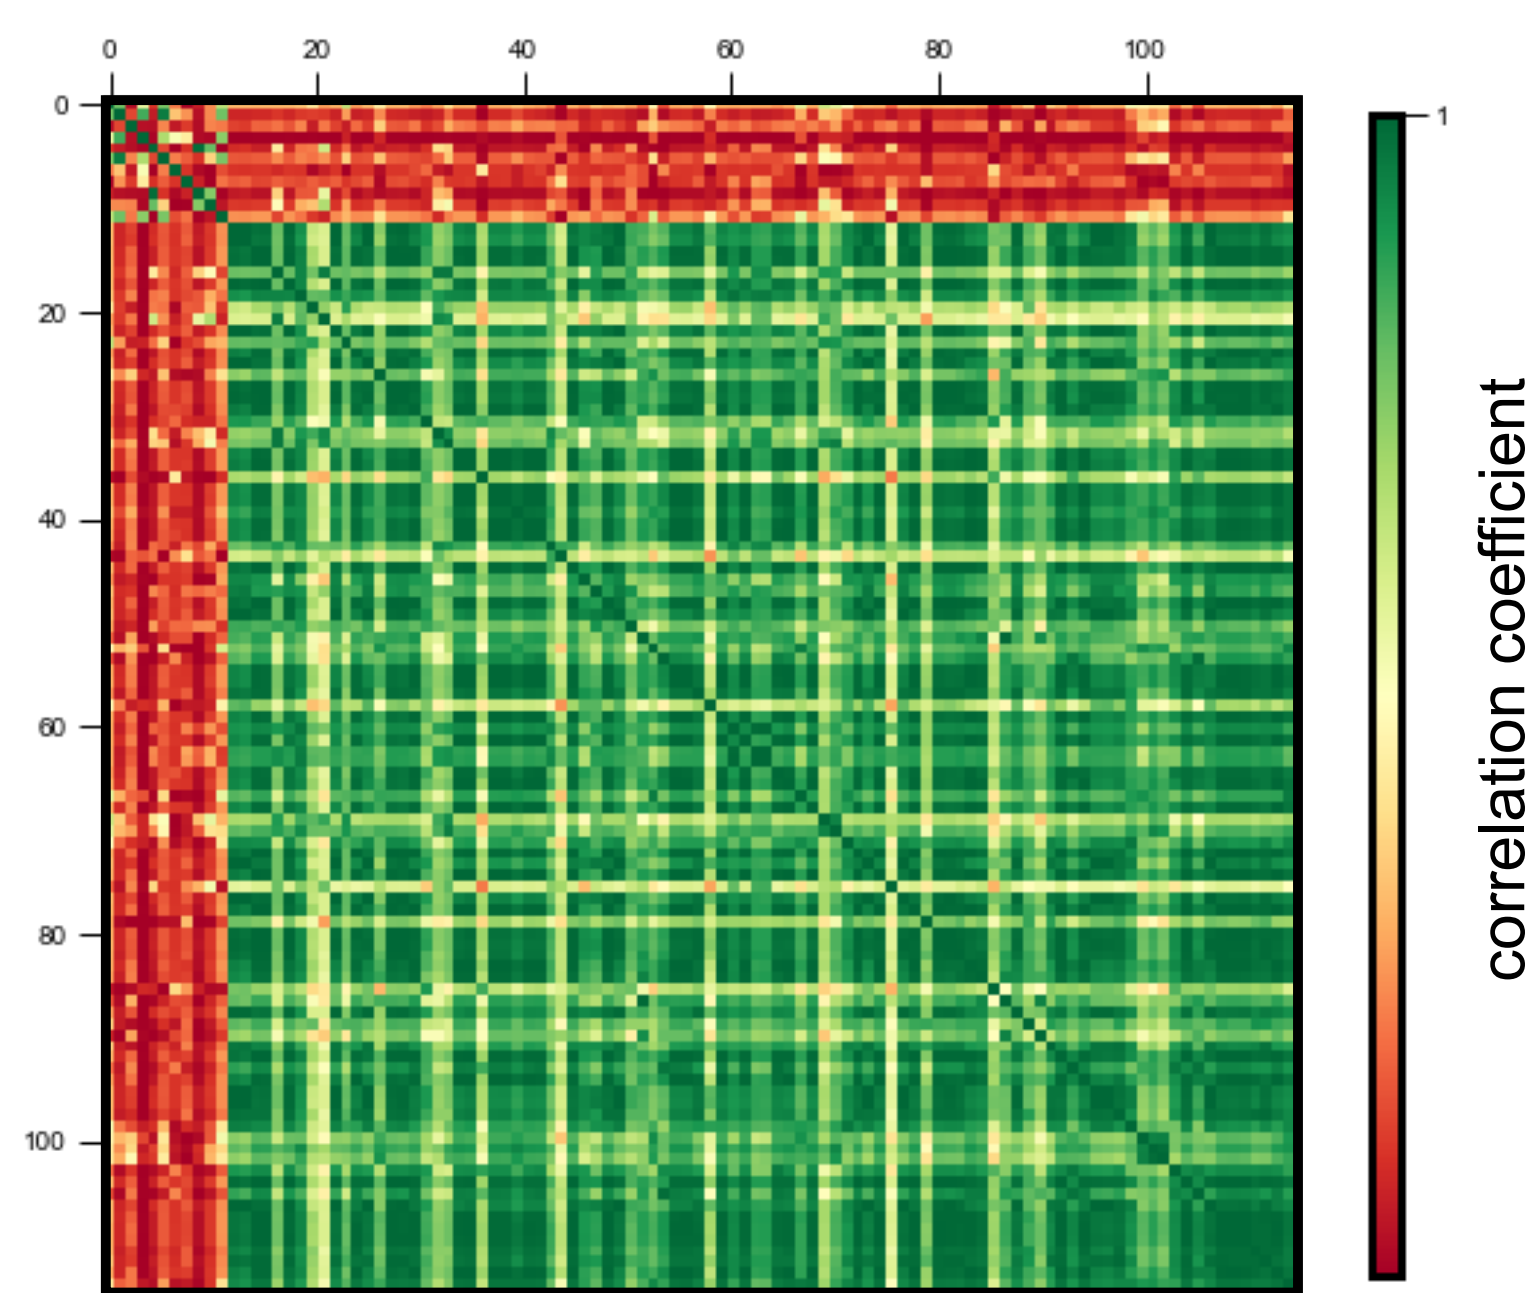**c**community M04  
ASV21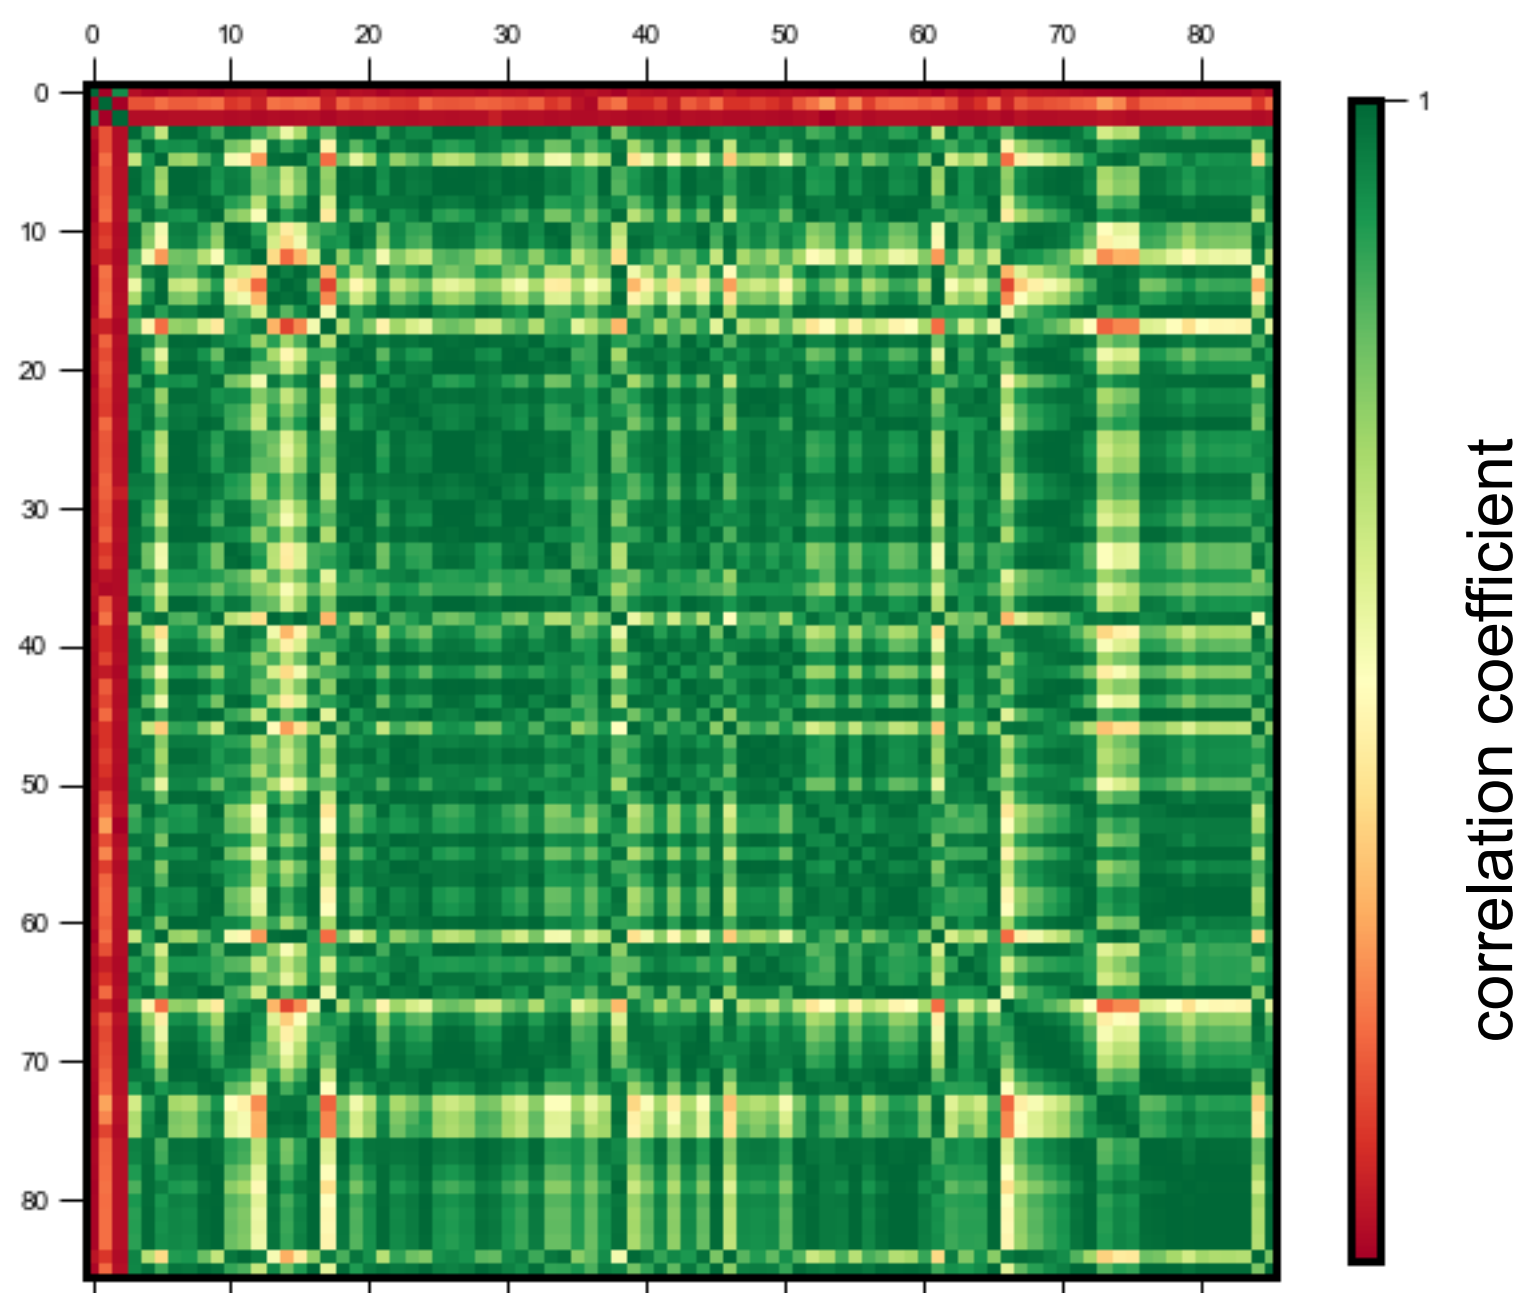**d**

distribution of clusters

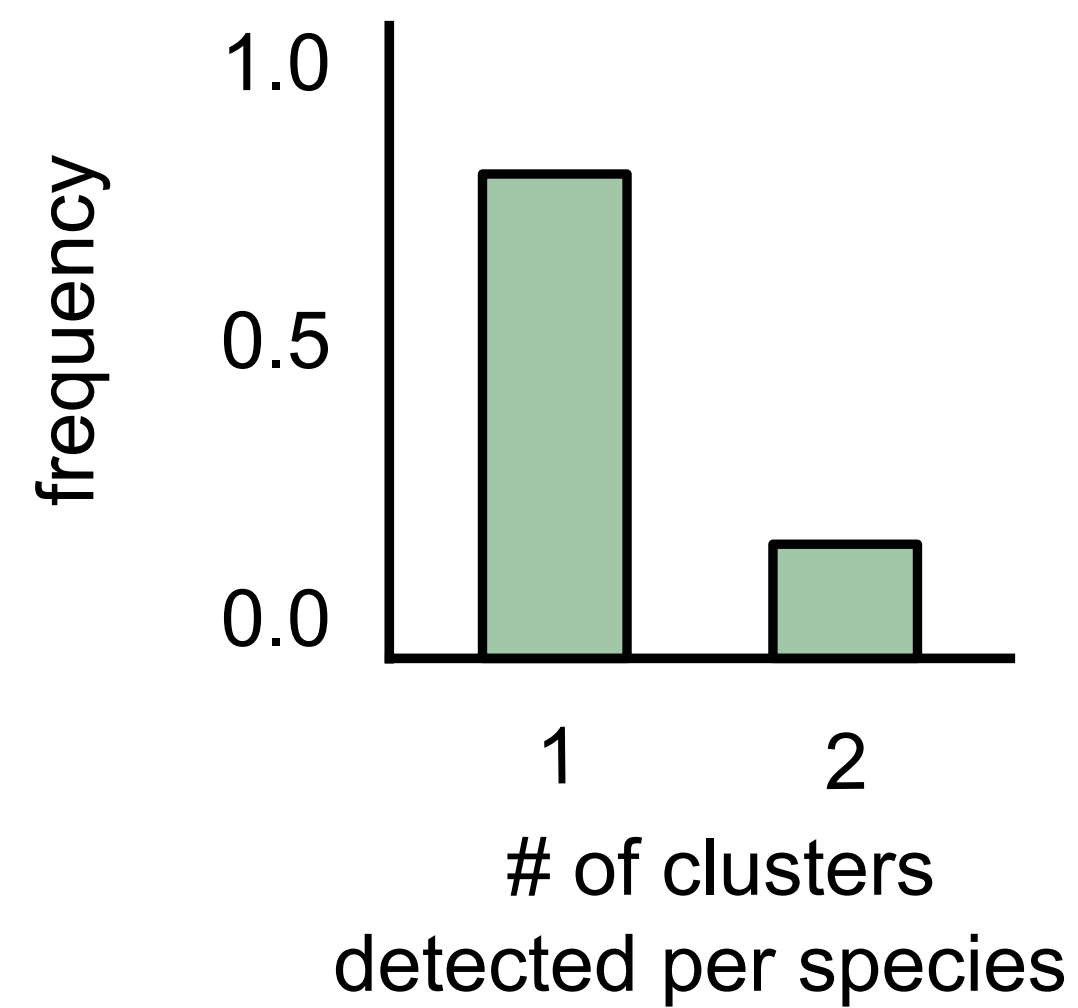

Supplement: supp [file elife-74987-supp-v1.zip]

community M03  
*ASV1 (Aquitalea)*

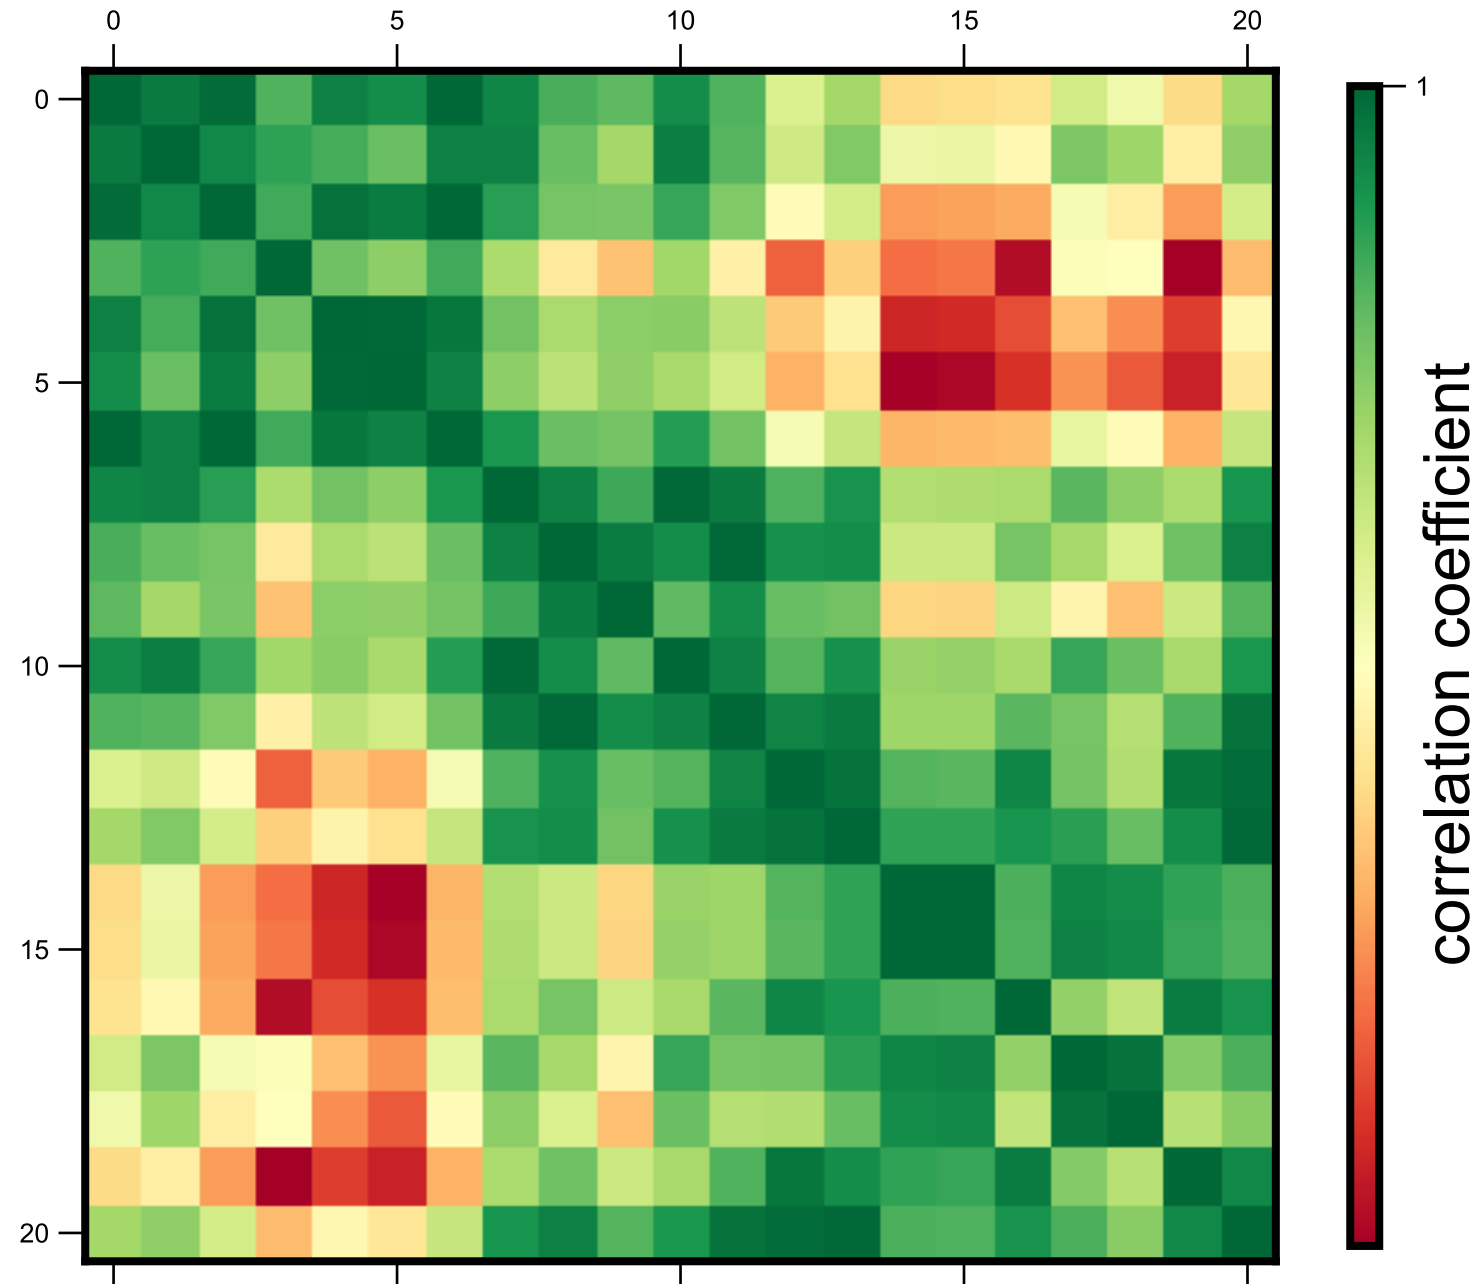

community M01  
*ASV1 (Aquitalea)*

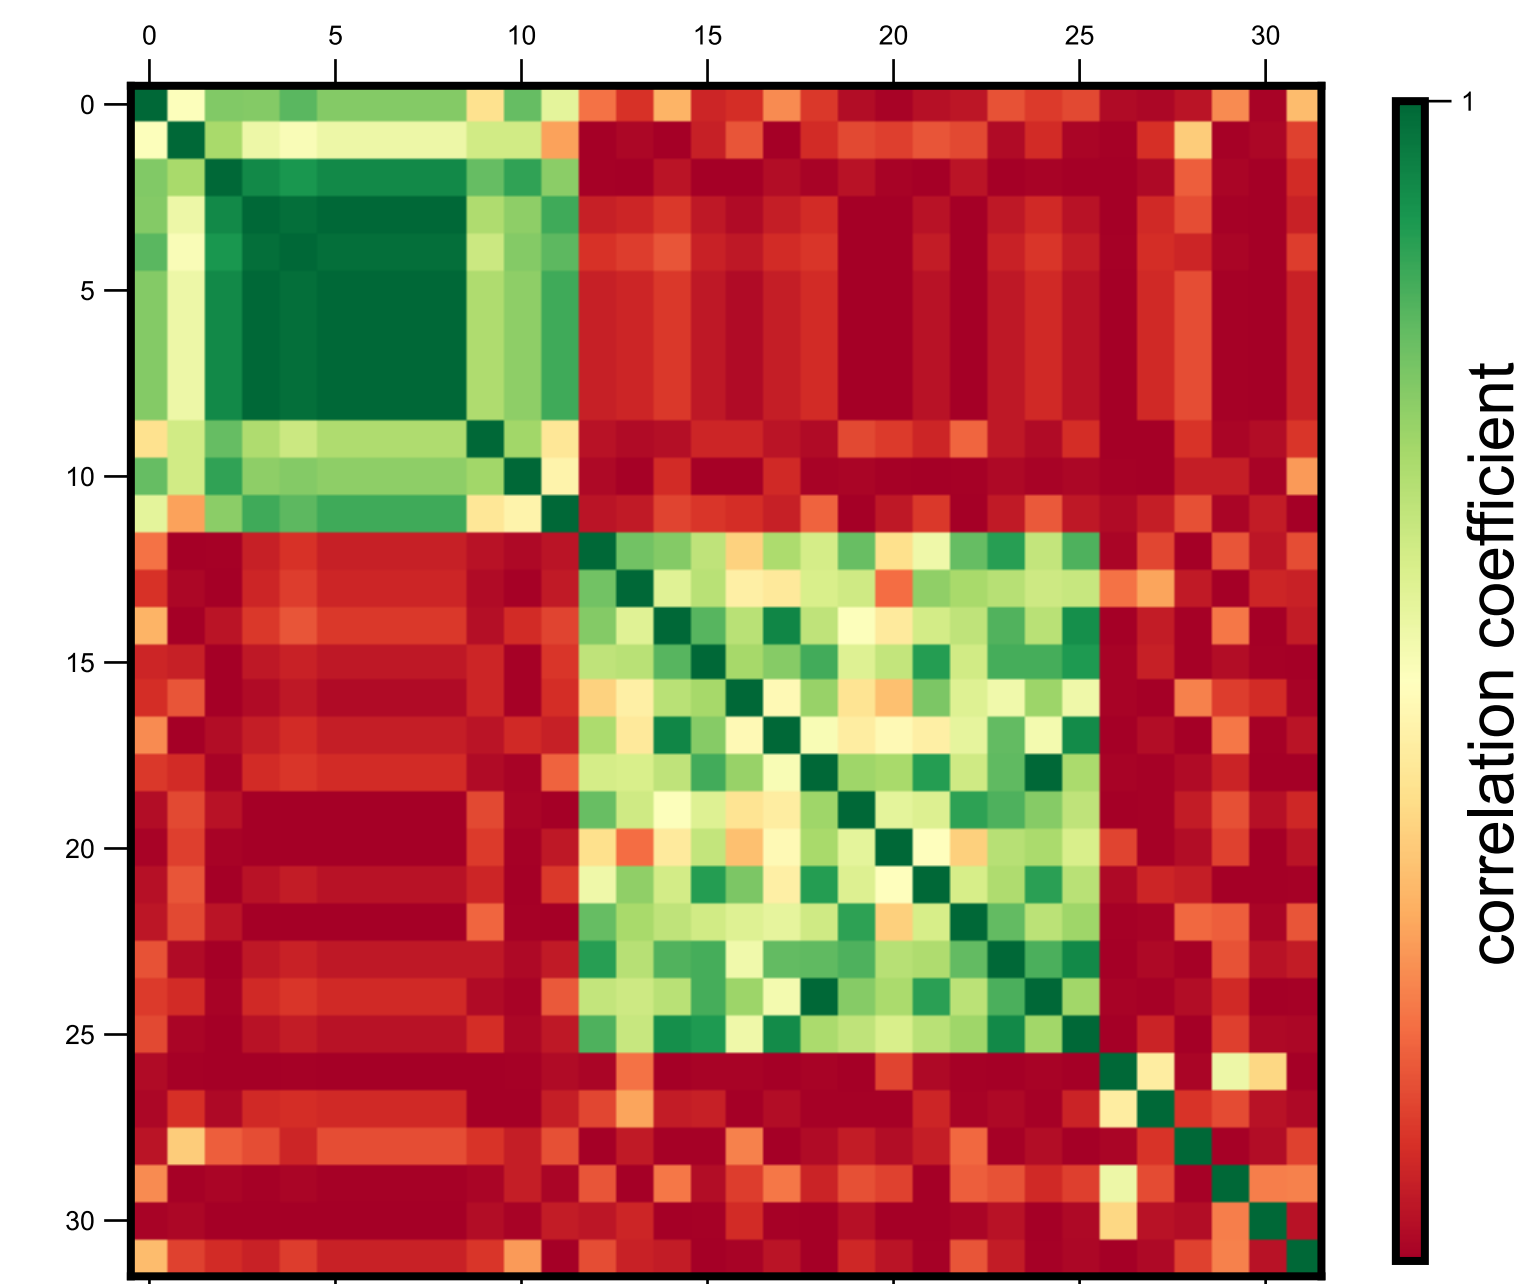

Supplement: supp [file elife-74987-supp-v1.zip]

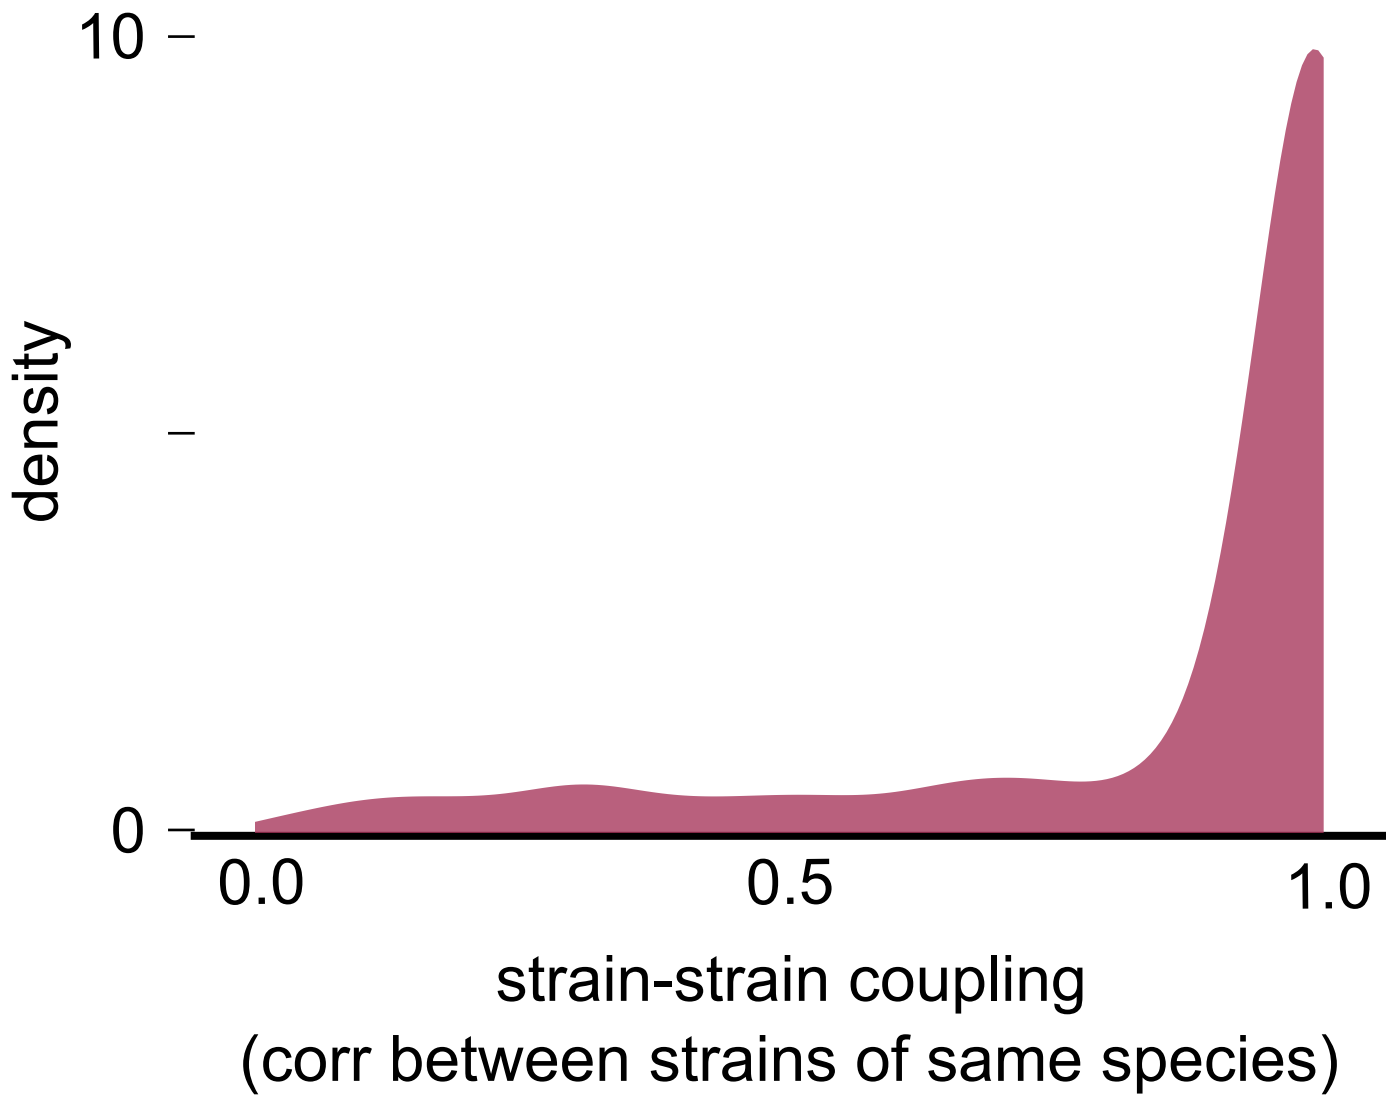

Supplement: supp [file elife-74987-supp-v1.zip]

strain-strain correlation

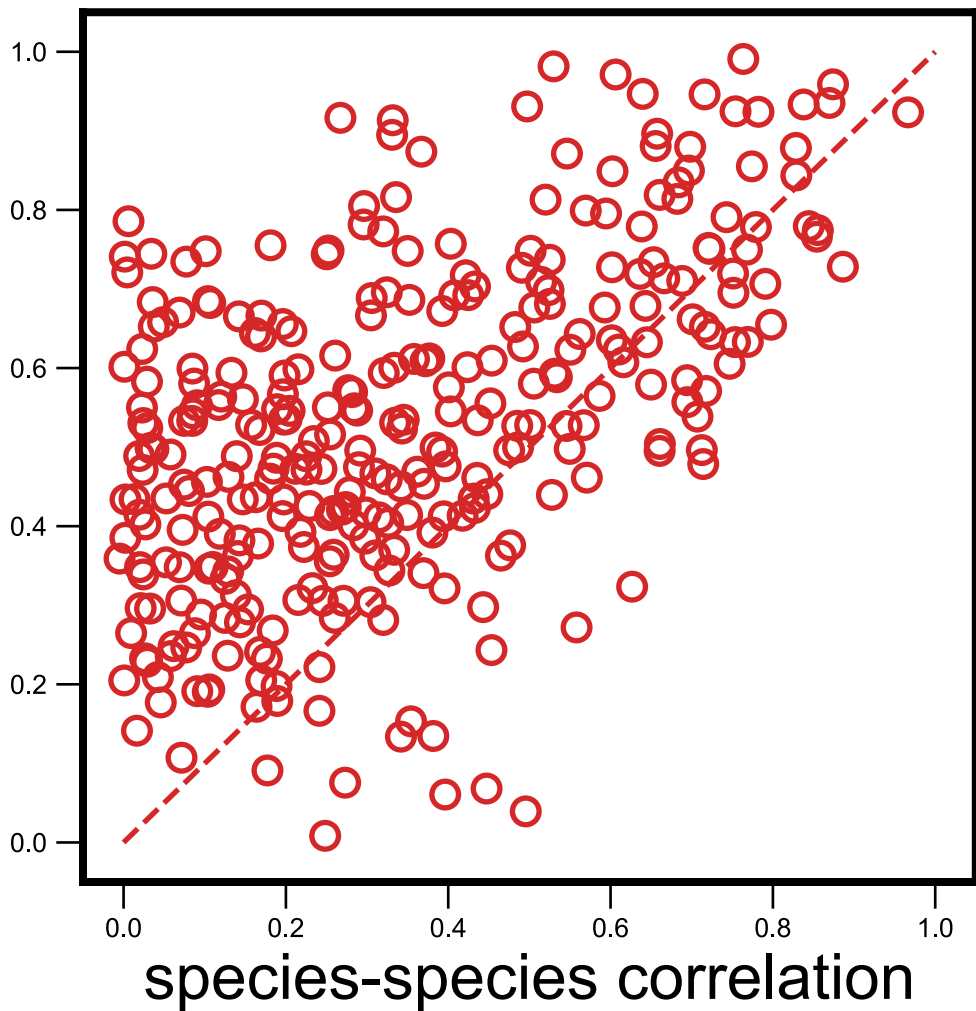

Supplement: supp [file elife-74987-supp-v1.zip]

**a**

community M03  
ASV1 (*Aquitalea*)

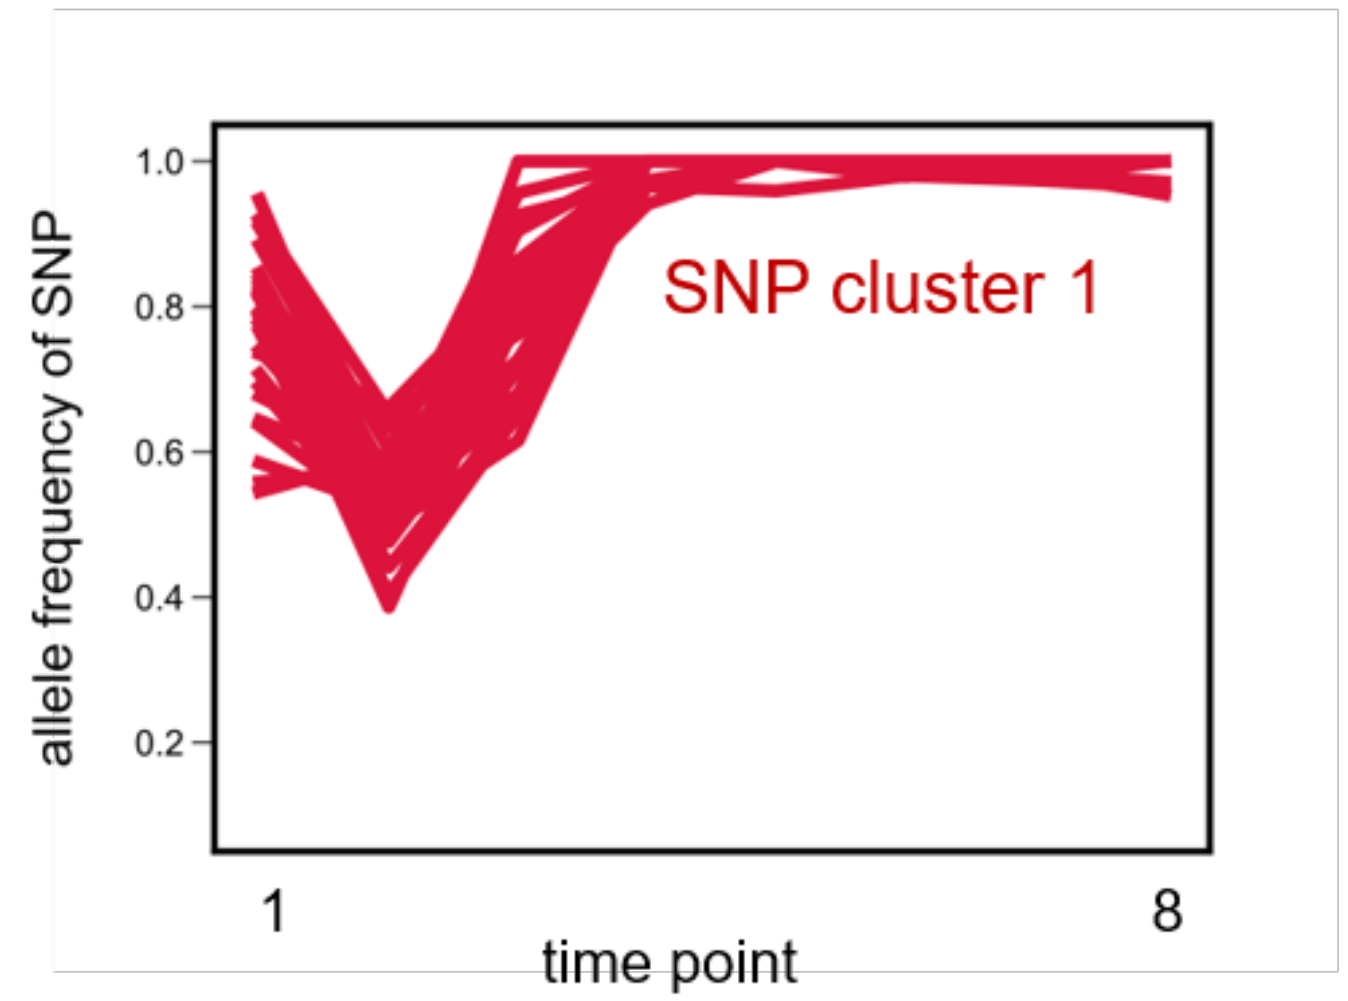

**b**

community M01  
ASV1 (*Aquitalea*)

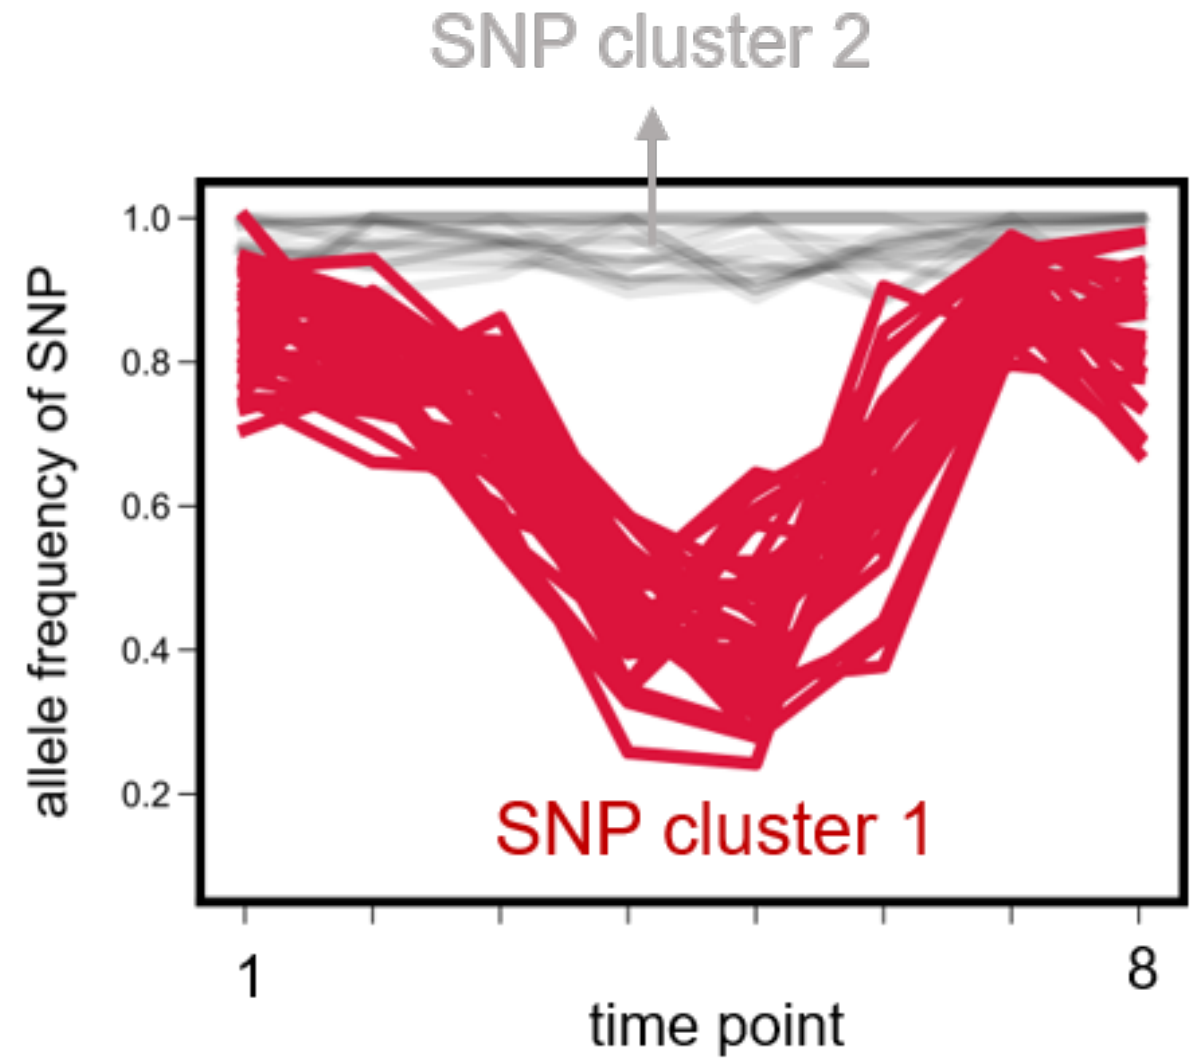

Supplement: supp [file elife-74987-supp-v1.zip]
